# Supplementary material
Source: HighWire-hosted journal article supplement (https://oem.bmj.com/content/78/3/203)
Supplement: inline-supplementary-material-1 [file inline-supplementary-material-1.pdf]

## Supplementary materials

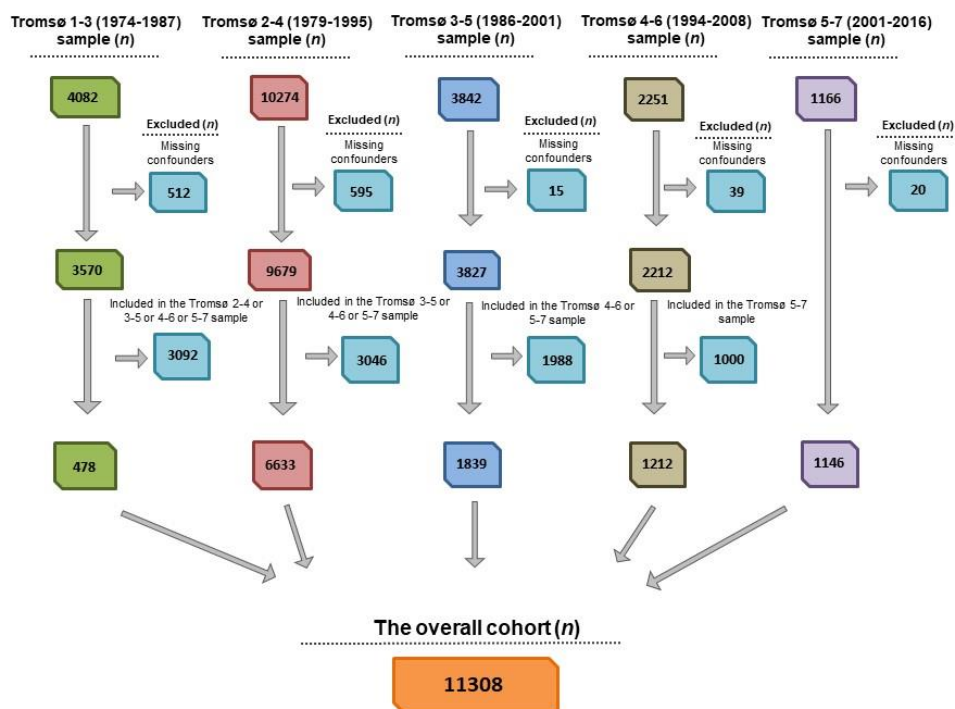

Supplementary Figure 1. Flow chart of selected participants.

### Supplementary file 1: Differences in the SGPALS questionnaire between the original and the one used in the Tromsø Study surveys.

As new behavioural concepts have emerged[1] and perhaps some jobs are automated due to technological developments, some of the work examples in answer alternatives for occupational physical activity are omitted and new examples are added. Work examples in our study differ from the original Saltin-Grimby Physical Activity Scale (SGPALS) by Saltin and Grimby in 1968[2]. For leisure time physical activity, a frequency specification in answering alternative three is added. The detailed differences are presented below. Table 1

presents the original occupational time SGPALS, and Table 2 presents the occupational time SGPALS used in the Tromsø Study.

**Table 1.** The original Occupational time SGPALS by Saltin and Grimby (1968, *Circulation*).

| <b>Question: Occupational Activity:</b>                                                                      |                                                                                                                    |                                                                                                                  |                                                                                           |
|--------------------------------------------------------------------------------------------------------------|--------------------------------------------------------------------------------------------------------------------|------------------------------------------------------------------------------------------------------------------|-------------------------------------------------------------------------------------------|
| 1                                                                                                            | 2                                                                                                                  | 3                                                                                                                | 4                                                                                         |
| <i>Predominantly sedentary, sitting: desk worker, watch maker, sitting assembly line worker (light gods)</i> | <i>Sitting or standing, some walking: cashier, general office worker, light tool and machinery worker, foreman</i> | <i>Walking, some handling of material: mailman, waiter, construction worker, heavy tool and machinery worker</i> | <i>Heavy manual work: lumberjack, dock worker, stone mason, farm worker, ditch digger</i> |

SGPALS=Saltin-Grimby Physical Activity Level Scale

**Table 2.** The Occupational time SGPALS in The Tromsø Study.

| <b>Occupational Physical Activity</b>                                                         |                                                                                                    |                                                                                                             |                                                                                 |
|-----------------------------------------------------------------------------------------------|----------------------------------------------------------------------------------------------------|-------------------------------------------------------------------------------------------------------------|---------------------------------------------------------------------------------|
| <b>Question:</b>                                                                              |                                                                                                    |                                                                                                             |                                                                                 |
| <i>Tromsø 1-3: Type of work: During the last year, have you had:</i>                          |                                                                                                    |                                                                                                             |                                                                                 |
| <i>Tromsø 4-6: If you have paid or unpaid work, which statement describes your work best?</i> |                                                                                                    |                                                                                                             |                                                                                 |
| 1                                                                                             | 2                                                                                                  | 3                                                                                                           | 4                                                                               |
| <i>Mostly sedentary work? (e.g. office work, watchmaker, light manual work)</i>               | <i>Work that requires a lot of walking? (e.g. shop assistant, light industrial work, teaching)</i> | <i>Work that requires a lot of walking and lifting? (e.g. postman, heavy industrial work, construction)</i> | <i>Heavy manual labour? (e.g. forestry, heavy farmwork, heavy construction)</i> |

SGPALS=Saltin-Grimby Physical Activity Level Scale

Tromsø 1, 2 and 3 included the same Occupational time SGPALS. Tromsø 4-6 asks the question differently, but the answer alternatives are similar. Both the questions and answer alternatives differ from the original SGPALS. Tromsø 5 replaced “*heavy industrial work*”

with “*nursing*” in their examples of work in answer alternative 3. When comparing the original with the occupational time SGPALS used in the Tromsø Study, questions differ.

- **Answer alternative 1)** have different wording but presents similar work examples.
- **Answer alternative 2)** the original states “*sitting, standing, some walking*” while the Tromsø Study states “*a lot of walking*”. In the Tromsø Study, “*cashier*” is rephrased to “*shop assistant*”, “*general office worker*” is removed, “*light tool and machinery worker*” is rephrased to “*light industrial work*” and “*foreman*” is replaced with “*teaching*”.
- **Answering alternative 3:** both the original and the Tromsø Study states walking and lifting but with different wording. Some work examples are similar, but “*waiter*” is removed in the Tromsø study and “*machinery worker*” is replaced with “*construction*”.
- **Answering alternative 4:** The original states “*heavy manual work*” and the Tromsø Study states “*heavy manual labour*”. In the Tromsø Study, “*lumberjack*” is replaced with “*forestry*”, “*stone mason*” is removed and “*ditch digger*” is replaced with “*construction*”.

Table 3 presents the original leisure time Saltin-Grimby Physical Activity Scale (SGPALS), and Table 4 presents the leisure time SGPALS used in the Tromsø Study.

**Table 3.** The original Leisure time SGPALS by Saltin and Grimby (1968, *Circulation*).

| <b>Leisure time Physical Activity</b>                                                                                                                                                        |                                                                                                                                                   |                                                                                      |                                                                                                                                        |
|----------------------------------------------------------------------------------------------------------------------------------------------------------------------------------------------|---------------------------------------------------------------------------------------------------------------------------------------------------|--------------------------------------------------------------------------------------|----------------------------------------------------------------------------------------------------------------------------------------|
| <b>Question:</b>                                                                                                                                                                             |                                                                                                                                                   |                                                                                      |                                                                                                                                        |
| <i>The following section deals with your spare-time physical activity. The table outlines four different levels. Please read the table carefully and then check appropriate boxes below:</i> |                                                                                                                                                   |                                                                                      |                                                                                                                                        |
| 1                                                                                                                                                                                            | 2                                                                                                                                                 | 3                                                                                    | 4                                                                                                                                      |
| <i>Almost completely inactive: reading, TV watching, movies etc.</i>                                                                                                                         | <i>Some physical activity during at least 4 hours per week: riding a bicycle or walking to work, walking or skiing with the family, gardening</i> | <i>Regular activity, such as heavy gardening, running, calisthenics, tennis etc.</i> | <i>Regular hard physical training for competition in running events, soccer, racing, European handball etc. Several times per week</i> |

SGPALS=Saltin-Grimby Physical Activity Level Scale

**Table 4.** The Leisure time SGPALS used in the Tromsø Study.

| <b>Leisure time Physical Activity</b>                                                                                                                                                                 |                                                                                                                                              |                                                                                                                           |                                                                                               |
|-------------------------------------------------------------------------------------------------------------------------------------------------------------------------------------------------------|----------------------------------------------------------------------------------------------------------------------------------------------|---------------------------------------------------------------------------------------------------------------------------|-----------------------------------------------------------------------------------------------|
| <b>Question:</b>                                                                                                                                                                                      |                                                                                                                                              |                                                                                                                           |                                                                                               |
| <i>Exercise and physical exertion in leisure time. If your activity varies much, for example between summer and winter, then give an average. The question refers only to the last twelve months.</i> |                                                                                                                                              |                                                                                                                           |                                                                                               |
| 1                                                                                                                                                                                                     | 2                                                                                                                                            | 3                                                                                                                         | 4                                                                                             |
| <i>Reading, watching TV, or other sedentary activity?</i>                                                                                                                                             | <i>Walking, cycling, or other forms of exercise at least 4 hours a week? Include walking or cycling to workplace, Sunday stroll/walk etc</i> | <i>Participation in recreational sports, heavy gardening, etc.? (note: duration of activity at least 4 hours a week).</i> | <i>Participation in hard training or sports competitions, regularly several times a week?</i> |

When comparing the original with the leisure time SGPALS used in the Tromsø Study, questions differs, and “*spare-time*” is rephrased to “*leisure time*” in the Tromsø Study. The Tromsø Study asks for an average over the last 12 months, while the original has no time period specification.

- **Answer alternative 1:** In the Tromsø Study, “*almost inactive*” is replaced by “*sedentary activity*”. Examples are similar.

- **Answer alternative 2:** both the original and the Tromsø Study require 4 hours per week and provide walking and cycling to work as an example. In the Tromsø Study, “*skiing with the family*” is replaced by “*Sunday stroll/walk*” and “*gardening*” is removed.
- **Answer alternative 3:** The Tromsø study require 4 hours per week, while the original have no frequency specification. “*Heavy gardening*” is in both, while “*running, calisthenics, tennis etc.*” is rephrased to “*recreational sports*” in the Tromsø Study.
- **Answer alternative 4:** Both specify hard training and require several time per week, while Tromsø Study rephrased “*running events, soccer, racing, European handball etc.*” with “*sports competition*”.

## REFERENCES

1. Grimby, G., Borjesson, M., Jonsdottir, I.H., et al., *The "Saltin-Grimby Physical Activity Level Scale" and its application to health research*. Scand J Med Sci Sports, 2015. **25 Suppl 4**: p. 119-25.
2. Saltin, B. and Grimby, G., *Physiological analysis of middle-aged and old former athletes. Comparison with still active athletes of the same ages*. Circulation, 1968. **38**(6): p. 1104-15.

**Supplementary Table 1.** Saltin-Grimby physical activity level scale (SGPALS).

|                      | <b>Occupational Physical Activity Level</b>                                                                                                                          | <b>Leisure Time Physical Activity Level</b>                                                                                                                 |
|----------------------|----------------------------------------------------------------------------------------------------------------------------------------------------------------------|-------------------------------------------------------------------------------------------------------------------------------------------------------------|
| Question             | <i>If you are in payed or unpaid work, how will you describe your work?</i>                                                                                          | <i>Estimate your physical activity level in your leisure time over the past year. If the physical activity varies throughout the year, give an average.</i> |
| Answer alternative 1 | Light occupational physical activity:<br><i>“Predominantly sedentary work: desk worker, sitting assembly line worker (light goods)”</i> ,                            | Almost completely Inactive:<br><i>“reading, TV watching or other sedentary activity”</i>                                                                    |
| Answer alternative 2 | Moderate occupational physical activity:<br><i>“Sitting or standing, some walking, teaching, cashier, general office worker, light tool and machinery worker,”</i> , | Moderately active:<br><i>“walking, cycling, or other forms of exercise at least 4 hours per week”</i>                                                       |
| Answer alternative 3 | Heavy occupational physical activity:<br><i>“Walking, some handling of material: nurse, construction worker”</i> ,                                                   | Highly active:<br><i>“participation in recreational sports, heavy gardening, etc. at least 4 hours per week”</i>                                            |
| Answer alternative 4 | Very heavy occupational physical activity:<br><i>“Heavy manual work”</i> .                                                                                           | Vigorously active: <i>“participation in hard training or sports competitions regularly several times a week”</i> .                                          |

**Supplementary Table 2.** Weight at examination 2 and 3 and weight change in the overall cohort and period-specific samples.

| <b>Tromsø 1-7 (1974-2016)</b>   | <b>N=11308</b> | <b>Examination 2</b> | <b>Examination 3</b> | <b>Change</b> |
|---------------------------------|----------------|----------------------|----------------------|---------------|
| Examination 2-3                 | Mean           | 72.71                | 75.15                | 2.44          |
| Weight (kg)                     | 95%CI          | 72.46 to 72.96       | 74.89 to 75.41       | 2.34 to 2.54  |
| <b>Period-specific samples*</b> |                |                      |                      |               |
| <i>Tromsø 1-3 (1974-87)#</i>    | N=3570         |                      |                      |               |
| Tromsø 2-3 (1979-87)            | Mean           | 76.86                | 78.41                | 1.54          |
| Weight (kg)                     | 95%CI          | 76.52 to 77.20       | 78.05 to 77.77       | 1.40 to 1.69  |
| <i>Tromsø 2-4 (1979-95)</i>     | N=9679         |                      |                      |               |
| Tromsø 3-4 (1986-95)            | Mean           | 70.73                | 73.97                | 3.24          |
| Weight (kg)                     | 95%CI          | 70.48 to 70.98       | 73.70 to 74.24       | 3.14 to 3.34  |
| <i>Tromsø 3-5 (1986-2001)</i>   | N=3827         |                      |                      |               |
| Tromsø 4-5 (1994-2001)          | Mean           | 73.71                | 76.41                | 2.71          |
| Weight (kg)                     | 95%CI          | 73.29 to 74.13       | 75.97 to 76.85       | 2.54 to 2.87  |
| <i>Tromsø 4-6 (1994-2008)</i>   | N=2212         |                      |                      |               |
| Tromsø-5-6 (2001-08)            | Mean           | 76.71                | 77.05                | 0.34          |
| Weight (kg)                     | 95%CI          | 76.13 to 77.29       | 75.46 to 77.64       | 0.12 to 0.56  |
| <i>Tromsø 5-7 (2001-2016)</i>   | N=1146         |                      |                      |               |
| Tromsø 6-7 (2007-16)            | Mean           | 78.18                | 78.75                | 0.57          |
| Weight (kg)                     | 95%CI          | 77.32 to 79.04       | 77.89 to 79.62       | 0.24 to 0.91  |

Data are shown as unadjusted mean and 95% CI. CI=confidence interval, Examination 2=second survey of the three attended surveys, Examination 3=third survey of the three attended surveys. \*Period specific samples include all participants for that period (i.e. these samples do not add up to the total cohort: Tromsø 1-7), #Tromsø 1 included only men.

**Supplementary Table 3.** Weight change by occupational physical activity change for the overall cohort and in strata of birth year, smoking, education and leisure time physical activity change.

| <b>Tromsø 1-7 (1974-2016)</b>           | <b>Change occupational physical activity examination 1 to 2</b> |                              |                            |                           |                           | <b>P<sub>equality</sub></b> |
|-----------------------------------------|-----------------------------------------------------------------|------------------------------|----------------------------|---------------------------|---------------------------|-----------------------------|
|                                         | <b>Total</b>                                                    | <b>Persistently inactive</b> | <b>Persistently Active</b> | <b>Active to inactive</b> | <b>Inactive to active</b> |                             |
| <b>Weight change examination 2 to 3</b> |                                                                 |                              |                            |                           |                           |                             |
| <i>Total (N)</i>                        | 11308                                                           | 3692                         | 5560                       | 741                       | 1315                      |                             |
| Weight (kg)                             | Mean                                                            | 2.32                         | 2.49                       | 2.37                      | 2.61                      | 0.32                        |
|                                         | 95% CI                                                          | 2.15 to 2.50                 | 2.35 to 2.63               | 1.98 to 2.75              | 2.32 to 2.90              |                             |
| <b>Sex</b>                              |                                                                 |                              |                            |                           |                           |                             |
| <i>Women (n)</i>                        | 5482                                                            | 1638                         | 2925                       | 319                       | 600                       |                             |
| Weight (kg)                             | Mean                                                            | 2.89                         | 2.92                       | 3.05                      | 3.18                      | 0.70                        |
|                                         | 95% CI                                                          | 2.62 to 3.16                 | 2.72 to 3.12               | 2.44 to 3.66              | 2.74 to 3.62              |                             |
| <i>Men (n)</i>                          | 5826                                                            | 2054                         | 2635                       | 422                       | 715                       |                             |
| Weight (kg)                             | Mean                                                            | 1.76                         | 2.11                       | 1.79                      | 2.08                      | 0.17                        |
|                                         | 95% CI                                                          | 1.54 to 2.01                 | 1.91 to 2.32               | 1.29 to 2.28              | 1.70 to 2.46              |                             |
| <b>Birth year</b>                       |                                                                 |                              |                            |                           |                           |                             |
| <i>≤1929 (n)</i>                        | 748                                                             | 239                          | 350                        | 60                        | 99                        |                             |
| Weight (kg)                             | Mean                                                            | -0.28                        | 0.51                       | 0.68                      | -0.92                     | 0.049                       |
|                                         | 95% CI                                                          | -0.97 to 0.42                | -0.05 to 1.06              | -0.60 to 1.96             | -1.93 to 0.08             |                             |
| <i>1930-1939 (n)</i>                    | 2974                                                            | 856                          | 1580                       | 189                       | 349                       |                             |
| Weight (kg)                             | Mean                                                            | 1.17                         | 1.44                       | 1.60                      | 0.97                      | 0.34                        |
|                                         | 95% CI                                                          | 0.80 to 1.54                 | 1.17 to 1.70               | 0.84 to 2.36              | 0.41 to 1.53              |                             |
| <i>1940-1949 (n)</i>                    | 4192                                                            | 1483                         | 2020                       | 260                       | 429                       |                             |
| Weight (kg)                             | Mean                                                            | 2.47                         | 2.61                       | 2.12                      | 3.09                      | 0.09                        |
|                                         | 95% CI                                                          | 2.19 to 2.75                 | 2.37 to 2.85               | 1.46 to 2.77              | 2.58 to 3.60              |                             |
| <i>1950-1959 (n)</i>                    | 3947                                                            | 932                          | 1430                       | 205                       | 380                       |                             |
| Weight (kg)                             | Mean                                                            | 3.91                         | 3.72                       | 3.75                      | 4.40                      | 0.15                        |
|                                         | 95% CI                                                          | 3.58 to 4.25                 | 3.45 to 3.99               | 3.04 to 4.45              | 3.88 to 4.91              |                             |
| <i>≥1960 (n)</i>                        | 447                                                             | 182                          | 180                        | 27                        | 58                        |                             |

|                                                                  |        |              |              |              |              |      |
|------------------------------------------------------------------|--------|--------------|--------------|--------------|--------------|------|
| Weight (kg)                                                      | Mean   | 3.01         | 3.18         | 3.22         | 3.83         | 0.88 |
|                                                                  | 95% CI | 2.05 to 3.98 | 2.20 to 4.17 | 0.77 to 5.68 | 2.13 to 5.52 |      |
| <b>Smoking</b>                                                   |        |              |              |              |              |      |
| <i>Current smoker (n)</i>                                        |        | 4480         | 1250         | 2343         | 306          | 581  |
| Weight (kg)                                                      | Mean   | 2.75         | 2.88         | 2.41         | 2.93         | 0.51 |
|                                                                  | 95% CI | 2.43 to 3.07 | 2.65 to 3.11 | 1.79 to 3.03 | 2.47 to 3.38 |      |
| <i>Previous smoker (n)</i>                                       |        | 1790         | 703          | 782          | 126          | 179  |
| Weight (kg)                                                      | Mean   | 0.97         | 1.18         | 1.54         | 1.28         | 0.69 |
|                                                                  | 95% CI | 0.56 to 1.38 | 0.79 to 1.57 | 0.58 to 2.49 | 0.47 to 2.08 |      |
| <i>Never smoker (n)</i>                                          |        | 5038         | 1739         | 2435         | 309          | 555  |
| Weight (kg)                                                      | Mean   | 2.52         | 2.57         | 2.64         | 2.72         | 0.87 |
|                                                                  | 95% CI | 2.28 to 2.76 | 2.36 to 2.77 | 2.08 to 3.21 | 2.30 to 3.15 |      |
| <b>Education</b>                                                 |        |              |              |              |              |      |
| <i>Primary school (n)</i>                                        |        | 4698         | 878          | 3010         | 265          | 545  |
| Weight (kg)                                                      | Mean   | 2.14         | 2.31         | 1.97         | 2.25         | 0.70 |
|                                                                  | 95% CI | 1.78 to 2.51 | 2.12 to 2.51 | 1.30 to 2.64 | 1.79 to 2.72 |      |
| <i>High School (n)</i>                                           |        | 3610         | 1361         | 1566         | 271          | 412  |
| Weight (kg)                                                      | Mean   | 2.49         | 2.71         | 2.40         | 3.20         | 0.10 |
|                                                                  | 95% CI | 2.21 to 2.77 | 2.45 to 2.97 | 1.77 to 3.02 | 2.68 to 3.70 |      |
| <i>University &lt;4 years (n)</i>                                |        | 1641         | 787          | 539          | 117          | 198  |
| Weight (kg)                                                      | Mean   | 2.53         | 2.68         | 2.59         | 2.78         | 0.93 |
|                                                                  | 95% CI | 2.15 to 2.91 | 2.22 to 3.14 | 1.61 to 3.57 | 2.02 to 3.53 |      |
| <i>University &gt;4 years (n)</i>                                |        | 1359         | 666          | 445          | 88           | 160  |
| Weight (kg)                                                      | Mean   | 2.12         | 2.40         | 3.46         | 2.13         | 0.11 |
|                                                                  | 95% CI | 1.74 to 2.51 | 1.92 to 2.88 | 2.43 to 4.49 | 1.37 to 2.90 |      |
| <b>Leisure time physical activity change examination 1 to 2*</b> |        |              |              |              |              |      |
| <i>Persistently inactive (n)</i>                                 |        | 813          | 332          | 317          | 63           | 101  |
| Weight (kg)                                                      | Mean   | 2.37         | 2.76         | 3.63         | 2.62         | 0.46 |
|                                                                  | 95% CI | 1.73 to 3.01 | 2.11 to 3.41 | 2.19 to 5.06 | 1.47 to 3.76 |      |
| <i>Persistently active (n)</i>                                   |        | 5368         | 1599         | 2798         | 328          | 643  |
| Weight (kg)                                                      | Mean   | 2.90         | 2.94         | 2.39         | 3.26         | 0.10 |
|                                                                  | 95% CI | 2.64 to 3.16 | 2.74 to 3.13 | 1.84 to 2.95 | 2.86 to 3.66 |      |
| <i>Active to inactive (n)</i>                                    |        | 974          | 291          | 469          | 71           | 143  |
| Weight (kg)                                                      | Mean   | 2.32         | 2.92         | 3.71         | 3.11         | 0.19 |
|                                                                  | 95% CI | 1.68 to 2.96 | 2.42 to 3.43 | 2.44 to 4.98 | 2.21 to 4.01 |      |
| <i>Inactive to active (n)</i>                                    |        | 999          | 348          | 451          | 66           | 134  |
| Weight (kg)                                                      | Mean   | 2.56         | 3.09         | 2.59         | 2.33         | 0.45 |
|                                                                  | 95% CI | 1.94 to 3.18 | 2.55 to 3.63 | 1.21 to 3.97 | 1.36 to 3.30 |      |

Data are adjusted for sex, birth year, smoking, education and weight at examination 2, and shown as adjusted mean and 95% CI. CI=confidence interval, Examination 1=first survey of the three attended surveys, Examination 2=second survey of the three attended surveys, Examination 3=third survey of the three attended surveys,  $P_{\text{equality}}$ =main differences between groups. \*The leisure time Saltin-Grimby Physical Activity Scale was not included in Tromsø 4 (1994-95), the analysis stratified on leisure time physical activity change is smaller ( $n=8154$ ) compared with the overall analysis ( $N=11308$ ).



**Supplementary Table 4.** Body mass index and weight change by six-group occupational physical activity change for sensitivity analyses. Results are for the overall cohort as overall and in strata of sex, birth year, smoking, education and leisure time physical activity change.

| Tromsø 1-7 (1974-2016)                        | Change occupational physical activity examination 1 to 2 |                       |                     |                       |                       |                    |                    | P <sub>equality</sub> |
|-----------------------------------------------|----------------------------------------------------------|-----------------------|---------------------|-----------------------|-----------------------|--------------------|--------------------|-----------------------|
|                                               | Total                                                    | Persistently inactive | Persistently Active | Active but decreasing | Active and increasing | active to inactive | Inactive to active |                       |
| Outcome change examination 2 to 3             |                                                          |                       |                     |                       |                       |                    |                    |                       |
| Total (n)                                     | 11308                                                    | 3692                  | 3991                | 1315                  | 741                   | 896                | 673                |                       |
| BMI (kg/m <sup>2</sup> )                      | Mean                                                     | 0.80                  | 0.84                | 0.91                  | 0.81                  | 0.98               | 0.90               | 0.15                  |
|                                               | 95% CI                                                   | 0.75 to 0.87          | 0.79 to 0.90        | 0.81 to 1.01          | 0.67 to 0.94          | 0.86 to 1.10       | 0.76 to 1.04       |                       |
| <b>Sex</b>                                    |                                                          |                       |                     |                       |                       |                    |                    |                       |
| Women (n)                                     | 5482                                                     | 1638                  | 2110                | 600                   | 319                   | 362                | 453                |                       |
| BMI (kg/m <sup>2</sup> )                      | Mean                                                     | 1.06                  | 1.04                | 1.18                  | 1.10                  | 1.36               | 1.13               | 0.10                  |
|                                               | 95% CI                                                   | 0.96 to 1.16          | 0.95 to 1.13        | 1.01 to 1.34          | 0.87 to 1.33          | 1.15 to 1.58       | 0.94 to 1.32       |                       |
| Men (n)                                       | 5826                                                     | 2054                  | 1881                | 715                   | 422                   | 534                | 220                |                       |
| BMI (kg/m <sup>2</sup> )                      | Mean                                                     | 0.56                  | 0.68                | 0.66                  | 0.55                  | 0.67               | 0.68               | 0.30                  |
|                                               | 95% CI                                                   | 0.49 to 0.63          | 0.60 to 0.75        | 0.54 to 0.78          | 0.39 to 0.71          | 0.52 to 0.81       | 0.47 to 0.90       |                       |
| <b>Birth year</b>                             |                                                          |                       |                     |                       |                       |                    |                    |                       |
| ≤1929 (n)                                     | 748                                                      | 239                   | 237                 | 99                    | 60                    | 85                 | 28                 |                       |
| BMI (kg/m <sup>2</sup> )                      | Mean                                                     | -0.09                 | 0.05                | -0.31                 | 0.20                  | 0.28               | 0.71               | 0.03                  |
|                                               | 95% CI                                                   | -0.32 to 0.13         | -0.16 to 0.27       | -0.64 to 0.01         | -0.22 to 0.62         | -0.08 to 0.63      | 0.09 to 1.32       |                       |
| 1930-1939 (n)                                 | 2974                                                     | 856                   | 1154                | 349                   | 189                   | 243                | 183                |                       |
| BMI (kg/m <sup>2</sup> )                      | Mean                                                     | 0.43                  | 0.53                | 0.36                  | 0.55                  | 0.60               | 0.41               | 0.54                  |
|                                               | 95% CI                                                   | 0.30 to 0.57          | 0.42 to 0.64        | 0.16 to 0.56          | 0.28 to 0.82          | 0.36 to 0.84       | 0.14 to 0.69       |                       |
| 1940-1949 (n)                                 | 4192                                                     | 1483                  | 1475                | 429                   | 260                   | 291                | 254                |                       |
| BMI (kg/m <sup>2</sup> )                      | Mean                                                     | 0.85                  | 0.87                | 1.06                  | 0.73                  | 1.06               | 1.03               | 0.09                  |
|                                               | 95% CI                                                   | 0.75 to 0.95          | 0.78 to 0.97        | 0.88 to 1.23          | 0.50 to 0.96          | 0.84 to 1.28       | 0.80 to 1.26       |                       |
| 1950-1959 (n)                                 | 2947                                                     | 932                   | 1005                | 380                   | 205                   | 243                | 182                |                       |
| BMI (kg/m <sup>2</sup> )                      | Mean                                                     | 1.34                  | 1.27                | 1.52                  | 1.28                  | 1.30               | 1.28               | 0.31                  |
|                                               | 95% CI                                                   | 1.22 to 1.45          | 1.16 to 1.38        | 1.34 to 1.70          | 1.04 to 1.52          | 1.08 to 1.52       | 1.02 to 1.54       |                       |
| ≥1960 (n)                                     | 447                                                      | 182                   | 120                 | 58                    | 27                    | 34                 | 26                 |                       |
| BMI (kg/m <sup>2</sup> )                      | Mean                                                     | 1.04                  | 0.92                | 1.13                  | 1.84                  | 1.84               | 1.00               | 0.45                  |
|                                               | 95% CI                                                   | 0.70 to 1.39          | 0.72 to 1.94        | 0.24 to 2.02          | 1.04 to 2.63          | 1.04 to 2.63       | 0.09 to 1.92       |                       |
| <b>Smoking</b>                                |                                                          |                       |                     |                       |                       |                    |                    |                       |
| Smoker (n)                                    | 4480                                                     | 1250                  | 1645                | 581                   | 306                   | 393                | 305                |                       |
| BMI (kg/m <sup>2</sup> )                      | Mean                                                     | 0.96                  | 0.99                | 1.02                  | 0.82                  | 1.12               | 0.93               | 0.46                  |
|                                               | 95% CI                                                   | 0.85 to 1.07          | 0.89 to 1.08        | 0.86 to 1.17          | 0.60 to 1.03          | 0.93 to 1.31       | 0.71 to 1.15       |                       |
| Previous (n)                                  | 1790                                                     | 703                   | 572                 | 179                   | 126                   | 126                | 84                 |                       |
| BMI (kg/m <sup>2</sup> )                      | Mean                                                     | 0.33                  | 0.39                | 0.43                  | 0.52                  | 0.55               | 0.45               | 0.83                  |
|                                               | 95% CI                                                   | 0.19 to 0.48          | 0.23 to 0.55        | 0.16 to 0.71          | 0.19 to 0.85          | 0.21 to 0.88       | 0.04 to 0.85       |                       |
| Never smoker (n)                              | 5038                                                     | 1739                  | 1774                | 555                   | 309                   | 377                | 284                |                       |
| BMI (kg/m <sup>2</sup> )                      | Mean                                                     | 0.87                  | 0.87                | 0.95                  | 0.91                  | 0.99               | 1.02               | 0.58                  |
|                                               | 95% CI                                                   | 0.78 to 0.95          | 0.79 to 0.95        | 0.81 to 1.10          | 0.71 to 1.10          | 0.81 to 1.17       | 0.81 to 1.23       |                       |
| <b>Education</b>                              |                                                          |                       |                     |                       |                       |                    |                    |                       |
| Primary school (n)                            | 4690                                                     | 878                   | 2110                | 545                   | 265                   | 532                | 368                |                       |
| BMI (kg/m <sup>2</sup> )                      | Mean                                                     | 0.75                  | 0.81                | 0.79                  | 0.68                  | 0.89               | 0.87               | 0.66                  |
|                                               | 95% CI                                                   | 0.62 to 0.88          | 0.72 to 0.89        | 0.63 to 0.95          | 0.45 to 0.92          | 0.73 to 1.06       | 0.67 to 1.07       |                       |
| High School (n)                               | 3610                                                     | 1361                  | 1092                | 412                   | 271                   | 253                | 221                |                       |
| BMI (kg/m <sup>2</sup> )                      | Mean                                                     | 0.87                  | 0.90                | 1.11                  | 0.82                  | 1.19               | 0.92               | 0.04                  |
|                                               | 95% CI                                                   | 0.77 to 0.97          | 0.79 to 1.01        | 0.93 to 1.29          | 0.60 to 1.03          | 0.97 to 1.42       | 0.68 to 1.16       |                       |
| University <4 years (n)                       | 1641                                                     | 787                   | 398                 | 198                   | 117                   | 76                 | 65                 |                       |
| BMI (kg/m <sup>2</sup> )                      | Mean                                                     | 0.85                  | 0.96                | 0.97                  | 0.88                  | 0.76               | 0.75               | 0.84                  |
|                                               | 95% CI                                                   | 0.72 to 0.98          | 0.78 to 1.14        | 0.71 to 1.22          | 0.55 to 1.21          | 0.34 to 1.17       | 0.31 to 1.20       |                       |
| University ≥4 years (n)                       | 1359                                                     | 666                   | 391                 | 160                   | 88                    | 35                 | 19                 |                       |
| BMI (kg/m <sup>2</sup> )                      | Mean                                                     | 0.72                  | 0.73                | 0.75                  | 1.16                  | 1.17               | 1.48               | 0.049                 |
|                                               | 95% CI                                                   | 0.59 to 0.85          | 0.56 to 0.90        | 0.49 to 1.01          | 0.81 to 1.50          | 0.62 to 1.72       | 0.73 to 2.23       |                       |
| <b>Leisure time physical activity change*</b> |                                                          |                       |                     |                       |                       |                    |                    |                       |

|                              |        |              |              |              |              |               |              |       |
|------------------------------|--------|--------------|--------------|--------------|--------------|---------------|--------------|-------|
| <i>Persistently inactive</i> | 813    | 332          | 233          | 101          | 63           | 45            | 39           |       |
| BMI (kg/m <sup>2</sup> )     | Mean   | 0.82         | 1.05         | 0.94         | 1.25         | 0.51          | 1.07         | 0.34  |
|                              | 95% CI | 0.60 to 1.03 | 0.80 to 1.31 | 0.55 to 1.32 | 0.76 to 1.73 | -0.07 to 1.10 | 0.44 to 1.69 |       |
| <i>Persistently active</i>   | 5368   | 1599         | 1998         | 643          | 328          | 462           | 338          |       |
| BMI (kg/m <sup>2</sup> )     | Mean   | 0.99         | 0.95         | 1.13         | 0.82         | 1.23          | 1.13         | 0.003 |
|                              | 95% CI | 0.90 to 1.08 | 0.87 to 1.03 | 1.00 to 1.27 | 0.63 to 1.02 | 1.07 to 1.40  | 0.93 to 1.32 |       |
| <i>Active to inactive</i>    | 974    | 291          | 324          | 143          | 71           | 78            | 67           |       |
| BMI (kg/m <sup>2</sup> )     | Mean   | 0.82         | 1.02         | 1.11         | 1.25         | 1.26          | 0.77         | 0.25  |
|                              | 95% CI | 0.60 to 1.04 | 0.82 to 1.23 | 0.80 to 1.43 | 0.80 to 1.69 | 0.84 to 1.69  | 0.31 to 1.24 |       |
| <i>Inactive to active</i>    | 999    | 348          | 318          | 134          | 66           | 85            | 48           |       |
| BMI (kg/m <sup>2</sup> )     | Mean   | 0.90         | 1.09         | 0.77         | 0.89         | 1.19          | 0.95         | 0.54  |
|                              | 95% CI | 0.69 to 1.11 | 0.87 to 1.31 | 0.43 to 1.10 | 0.42 to 1.37 | 0.77 to 1.61  | 0.39 to 1.51 |       |

Data are adjusted for sex, birth year, smoking, education and BMI or weight at examination 2, and shown as adjusted mean and 95% CI. CI=confidence interval, BMI=body mass index, P<sub>equality</sub>=main difference between groups. \*The leisure time Saltin-Grimby Physical Activity Scale was not included in Tromsø 4 (1994-95).

**Supplementary Table 5.** BMI and weight change by occupational physical activity change for the Tromsø 5-7 sample in total and in strata of sex, birth year, smoking, education and leisure time physical activity change.

| <b>Tromsø 5-7 (2001-2016)</b> | <b>Change occupational physical activity Tromsø 5-6 (2001 to 2007-08)</b> |                              |                            |                           |                           | <b>P<sub>equality</sub></b> |
|-------------------------------|---------------------------------------------------------------------------|------------------------------|----------------------------|---------------------------|---------------------------|-----------------------------|
|                               | <b>Total</b>                                                              | <b>Persistently inactive</b> | <b>Persistently Active</b> | <b>Active to inactive</b> | <b>Inactive to active</b> |                             |
|                               | <b>Outcome change Tromsø 6-7 (2007-08 to 2015-16)</b>                     |                              |                            |                           |                           |                             |
| <i>Total (n)</i>              | 1146                                                                      | 481                          | 501                        | 60                        | 104                       |                             |
| BMI (kg/m <sup>2</sup> )      | Mean                                                                      | 0.07                         | 0.35                       | 0.14                      | 0.21                      | 0.19                        |
|                               | 95% CI                                                                    | -0.11 to 0.25                | 0.17 to 0.53               | -0.36 to 0.64             | -0.17 to 0.60             |                             |
| Weight (kg)                   | Mean                                                                      | 0.24                         | 1.01                       | 0.32                      | 0.57                      | 0.13                        |
| n=1147                        | 95%CI                                                                     | -0.36 to 0.65                | 0.51 to 1.51               | -1.09 to 1.73             | -0.50 to 1.65             |                             |
|                               |                                                                           | n=482                        |                            |                           |                           |                             |
|                               | <b>Change occupational physical activity Tromsø 5-6 (2001 to 2007-08)</b> |                              |                            |                           |                           |                             |
| <b>Sex</b>                    | <b>Total</b>                                                              | <b>Persistently inactive</b> | <b>Persistently Active</b> | <b>Active to inactive</b> | <b>Inactive to active</b> | <b>P<sub>equality</sub></b> |
|                               | <b>Outcome change Tromsø 6-7 (2007-08 to 2015-16)</b>                     |                              |                            |                           |                           |                             |
| <i>Women (n)</i>              | 611                                                                       | 253                          | 278                        | 30                        | 50                        |                             |
| BMI (kg/m <sup>2</sup> )      | Mean                                                                      | 0.29                         | 0.40                       | 0.50                      | 0.37                      | 0.92                        |
|                               | 95% CI                                                                    | 0.01 to 0.56                 | 0.14 to 0.66               | -0.29 to 1.29             | -0.25 to 0.98             |                             |
| Weight (kg)                   | Mean                                                                      | 0.77                         | 1.06                       | 1.40                      | 1.05                      | 0.91                        |
| n=612                         | 95% CI                                                                    | 0.05 to 1.48                 | 0.38 to 1.75               | -0.57 to 3.48             | -0.57 to 2.67             |                             |
|                               |                                                                           | n=254                        |                            |                           |                           |                             |
| <i>Men (n)</i>                | 535                                                                       | 228                          | 223                        | 30                        | 54                        |                             |
| BMI (kg/m <sup>2</sup> )      | Mean                                                                      | -0.21                        | 0.34                       | -0.26                     | 0.02                      | 0.016                       |
|                               | 95% CI                                                                    | -0.44 to 0.02                | 0.10 to 0.58               | -0.86 to 0.35             | -0.44 to 0.47             |                             |
| Weight (kg)                   | Mean                                                                      | -0.64                        | 1.08                       | -0.89                     | -0.02                     | 0.013                       |
|                               | 95% CI                                                                    | -1.35 to 0.08                | 0.34 to 1.82               | -2.78 to 1.01             | -1.44 to 1.40             |                             |
|                               | <b>Change occupational physical activity Tromsø 5-6 (2001 to 2007-08)</b> |                              |                            |                           |                           |                             |
| <b>Birth year</b>             | <b>Total</b>                                                              | <b>Persistently inactive</b> | <b>Persistently Active</b> | <b>Active to inactive</b> | <b>Inactive to active</b> | <b>P<sub>equality</sub></b> |
|                               | <b>Outcome change Tromsø 6-7 (2007-08 to 2015-16)</b>                     |                              |                            |                           |                           |                             |
| <i>≤1949 (n)</i>              | 625                                                                       | 249                          | 290                        | 32                        | 54                        |                             |
| BMI (kg/m <sup>2</sup> )      | Mean                                                                      | -0.39                        | 0.01                       | 0.18                      | -0.09                     | 0.07                        |
|                               | 95% CI                                                                    | -0.63 to -0.16               | -0.21 to 0.23              | -0.47 to 0.82             | -0.59 to 0.41             |                             |
| Weight change (kg)            | Mean                                                                      | -1.23                        | 0.03                       | 0.45                      | -0.22                     | 0.041                       |
| n=626                         | 95% CI                                                                    | -1.90 to -0.56               | -0.60 to 0.65              | -1.39 to 2.30             | -1.65 to 1.20             |                             |
|                               |                                                                           | n=250                        |                            |                           |                           |                             |
| <i>1950-1959 (n)</i>          | 266                                                                       | 125                          | 111                        | 15                        | 15                        |                             |
| BMI (kg/m <sup>2</sup> )      | Mean                                                                      | 0.42                         | 0.64                       | 0.18                      | 0.18                      | 0.57                        |
|                               | 95% CI                                                                    | 0.13 to 0.71                 | 0.32 to 0.95               | -0.65 to 1.02             | -0.66 to 1.02             |                             |
| Weight (kg)                   | Mean                                                                      | 1.12                         | 1.83                       | 0.31                      | 0.37                      | 0.50                        |

|                                                                           |              |                              |                            |                           |                           |                             |
|---------------------------------------------------------------------------|--------------|------------------------------|----------------------------|---------------------------|---------------------------|-----------------------------|
|                                                                           | 95% CI       | 0.36 to 2.06                 | 0.91 to 2.75               | -2.12 to 2.73             | -2.06 to 2.79             |                             |
| $\geq 1960$ (n)                                                           | 255          | 107                          | 100                        | 13                        | 35                        |                             |
| BMI (kg/m <sup>2</sup> )                                                  | Mean         | 0.82                         | 0.85                       | -0.01                     | 0.98                      | 0.67                        |
|                                                                           | 95% CI       | 0.33 to 1.31                 | 0.34 to 1.36               | -1.40 to 1.38             | 0.13 to 1.84              |                             |
| Weight (kg)                                                               | Mean         | 2.30                         | 2.45                       | -0.07                     | 2.75                      | 0.62                        |
|                                                                           | 95% CI       | 0.97 to 3.63                 | 1.06 to 3.84               | -3.82 to 3.68             | 0.43 to 5.06              |                             |
| <b>Change occupational physical activity Tromsø 5-6 (2001 to 2007-08)</b> |              |                              |                            |                           |                           |                             |
| <b>Smoking</b>                                                            | <b>Total</b> | <b>Persistently inactive</b> | <b>Persistently Active</b> | <b>Active to inactive</b> | <b>Inactive to active</b> | <b>P<sub>equality</sub></b> |
| <b>Outcome change Tromsø 6-7 (2007-08 to 2015-16)</b>                     |              |                              |                            |                           |                           |                             |
| <i>Smoker</i> (n)                                                         | 196          | 64                           | 100                        | 11                        | 21                        |                             |
| BMI (kg/m <sup>2</sup> )                                                  | Mean         | 0.80                         | 0.83                       | -0.12                     | 1.07                      | 0.67                        |
|                                                                           | 95% CI       | 0.11 to 1.48                 | 0.29 to 1.38               | -1.71 to 1.46             | -0.10 to 2.23             |                             |
| Weight (kg)                                                               | Mean         | 1.98                         | 2.39                       | -0.17                     | 2.78                      | 0.70                        |
| (n=197)                                                                   | 95% CI       | 0.18 to 3.79                 | 0.93 to 3.85               | -4.40 to 4.07             | -0.39 to 5.82             |                             |
|                                                                           |              | (n=65)                       |                            |                           |                           |                             |
| <i>Previous</i> (n)                                                       | 517          | 222                          | 225                        | 27                        | 43                        |                             |
| BMI (kg/m <sup>2</sup> )                                                  | Mean         | -0.10                        | 0.29                       | 0.12                      | 0.19                      | 0.18                        |
|                                                                           | 95% CI       | -0.34 to 0.14                | 0.04 to 0.53               | -0.57 to 0.80             | -0.36 to 0.74             |                             |
| Weight (kg)                                                               | Mean         | -0.31                        | 0.77                       | 0.22                      | 0.59                      | 0.20                        |
|                                                                           | 95% CI       | -1.01 to 0.40                | 0.07 to 1.47               | -1.77 to 2.22             | -1.00 to 2.19             |                             |
| <i>Never smoker</i> (n)                                                   | 433          | 195                          | 176                        | 22                        | 40                        |                             |
| BMI (kg/m <sup>2</sup> )                                                  | Mean         | -0.05                        | 0.23                       | 0.34                      | -0.19                     | 0.37                        |
|                                                                           | 95% CI       | -0.31 to 0.21                | -0.05 to 0.50              | -0.42 to 1.10             | -0.76 to 0.38             |                             |
| Weight (kg)                                                               | Mean         | -0.16                        | 0.72                       | 0.85                      | -0.54                     | 0.29                        |
|                                                                           | 95% CI       | -0.88 to 0.56                | -0.05 to 1.49              | -1.26 to 2.97             | -2.13 to 1.05             |                             |
| <b>Change occupational physical activity Tromsø 5-6 (2001 to 2007-08)</b> |              |                              |                            |                           |                           |                             |
| <b>Education</b>                                                          | <b>Total</b> | <b>Persistently inactive</b> | <b>Persistently Active</b> | <b>Active to inactive</b> | <b>Inactive to active</b> | <b>P<sub>equality</sub></b> |
| <b>Outcome change Tromsø 6-7 (2007-08 to 2015-16)</b>                     |              |                              |                            |                           |                           |                             |
| <i>Primary school</i> (n)                                                 | 299          | 77                           | 186                        | 18                        | 18                        |                             |
| BMI (kg/m <sup>2</sup> )                                                  | Mean         | 0.04                         | 0.54                       | 0.14                      | 0.20                      | 0.33                        |
|                                                                           | 95% CI       | -0.42 to 0.50                | 0.24 to 0.83               | -0.83 to 1.11             | -0.76 to 1.16             |                             |
| Weight (kg)                                                               | Mean         | 0.12                         | 1.55                       | 0.38                      | 0.94                      | 0.32                        |
|                                                                           | 95% CI       | -1.20 to 1.43                | 0.71 to 2.39               | -2.35 to 3.12             | -1.89 to 3.56             |                             |
| <i>High School</i> (n)                                                    | 419          | 161                          | 206                        | 20                        | 32                        |                             |
| BMI (kg/m <sup>2</sup> )                                                  | Mean         | 0.02                         | 0.50                       | -0.004                    | 0.13                      | 0.16                        |
|                                                                           | 95% CI       | -0.31 to 0.35                | 0.21 to 0.79               | -0.92 to 0.91             | -0.60 to 0.86             |                             |
| Weight change (kg)                                                        | Mean         | -0.06                        | 1.38                       | 0.03                      | 0.12                      | 0.10                        |
| (n=420)                                                                   | 95% CI       | -0.95 to 0.83                | 0.60 to 2.16               | -2.46 to 2.53             | -1.87 to 2.11             |                             |
|                                                                           |              | (n=162)                      |                            |                           |                           |                             |
| <i>University &lt;4 years</i> (n)                                         | 209          | 128                          | 46                         | 12                        | 23                        |                             |
| BMI (kg/m <sup>2</sup> )                                                  | Mean         | -0.07                        | -0.18                      | 0.39                      | -0.10                     | 0.83                        |
|                                                                           | 95% CI       | -0.40 to 0.26                | -0.75 to 0.38              | -0.70 to 1.48             | -0.89 to 0.68             |                             |
| Weight (kg)                                                               | Mean         | -0.14                        | -0.63                      | 0.95                      | -0.30                     | 0.86                        |
|                                                                           | 95% CI       | -1.12 to 0.84                | -2.29 to 1.03              | -2.27 to 4.17             | -2.62 to 2.01             |                             |
| <i>University &gt;4 years</i> (n)                                         | 219          | 115                          | 63                         | 10                        | 31                        |                             |
| BMI (kg/m <sup>2</sup> )                                                  | Mean         | 0.17                         | 0.001                      | 0.37                      | 0.42                      | 0.73                        |
|                                                                           | 95% CI       | -0.16 to 0.49                | -0.45 to 0.46              | -0.71 to 1.45             | -0.19 to 1.03             |                             |
| Weight (kg)                                                               | Mean         | 0.40                         | 0.08                       | 0.83                      | 1.27                      | 0.75                        |
|                                                                           | 95% CI       | -0.53 to 1.33                | -2.25 to 3.91              | -2.25 to 3.91             | -0.49 to 3.02             |                             |
| <b>Change occupational physical activity Tromsø 5-6 (2001 to 2007-08)</b> |              |                              |                            |                           |                           |                             |
| <b>Leisure time physical activity change Tromsø 5-6 (2001-08)</b>         | <b>Total</b> | <b>Persistently inactive</b> | <b>Persistently Active</b> | <b>Active to inactive</b> | <b>Inactive to active</b> | <b>P<sub>equality</sub></b> |
| <b>Outcome change Tromsø 6-7 (2007-08 to 2015-16)</b>                     |              |                              |                            |                           |                           |                             |
| <i>Persistently inactive</i> (n)                                          | 85           | 48                           | 28                         | 3                         | 6                         |                             |
| BMI (kg/m <sup>2</sup> )                                                  | Mean         | -0.32                        | 0.63                       | 0.35                      | -1.15                     | 0.13                        |
|                                                                           | 95% CI       | -0.88 to 0.24                | -0.14 to 1.39              | -1.84 to 2.53             | -2.71 to 0.42             |                             |
| Weight (kg)                                                               | Mean         | -1.12                        | 2.26                       | 0.79                      | -2.45                     | 0.14                        |
|                                                                           | 95% CI       | -2.89 to 0.65                | -0.16 to 4.68              | -6.14 to 7.72             | -7.40 to 2.49             |                             |

|                                |        |               |               |               |               |      |
|--------------------------------|--------|---------------|---------------|---------------|---------------|------|
| <i>Persistently active (n)</i> | 771    | 295           | 361           | 42            | 73            |      |
| BMI (kg/m <sup>2</sup> )       | Mean   | 0.11          | 0.33          | 0.18          | 0.23          | 0.58 |
|                                | 95% CI | -0.12 to 0.33 | 0.12 to 0.54  | -0.42 to 0.77 | -0.23 to 0.68 |      |
| Weight (kg)                    | Mean   | 0.24          | 0.95          | 0.41          | 0.63          | 0.46 |
| (n=772)                        | 95% CI | -0.40 to 0.87 | 0.37 to 1.53  | -1.24 to 2.07 | -0.64 to 1.89 |      |
|                                |        | (n=296)       |               |               |               |      |
| <i>Active to inactive (n)</i>  | 117    | 62            | 36            | 7             | 12            |      |
| BMI (kg/m <sup>2</sup> )       | Mean   | 0.57          | 0.96          | -0.45         | -0.07         | 0.20 |
|                                | 95% CI | 0.07 to 1.08  | 0.29 to 1.64  | -1.95 to 1.05 | -1.22 to 1.09 |      |
| Weight (kg)                    | Mean   | 1.59          | 2.70          | -1.47         | -0.24         | 0.19 |
|                                | 95% CI | 0.16 to 3.03  | 0.79 to 4.61  | -5.74 to 2.80 | -3.52 to 3.05 |      |
| <i>Inactive to active (n)</i>  | 80     | 42            | 28            | 3             | 7             |      |
| BMI (kg/m <sup>2</sup> )       | Mean   | -0.52         | -0.17         | 0.004         | 1.01          | 0.32 |
|                                | 95% CI | -1.11 to 0.07 | -0.89 to 0.56 | -2.19 to 2.20 | -0.48 to 2.49 |      |
| Weight (kg)                    | Mean   | -1.71         | -0.40         | 0.02          | 2.98          | 0.26 |
|                                | 95% CI | -3.44 to 0.02 | -2.53 to 1.72 | -6.37 to 6.41 | -1.34 to 7.30 |      |

Data are adjusted for sex, birth year, smoking, education and BMI or weight at Tromsø 6, and shown as adjusted mean and 95% CI. CI=confidence interval, BMI=body mass index, P<sub>equality</sub>=main differences between groups.

**Supplementary Table 6.** BMI and weight change by occupational physical activity change for the Tromsø 4-6 sample in total and in strata of sex, birth year, smoking and education.

| <b>Tromsø 4-6 (1994-2008)</b> | <b>Change occupational physical activity Tromsø 4-5 (1994-95 to 2001)</b> |                              |                            |                           |                           | <b>P<sub>equality</sub></b> |
|-------------------------------|---------------------------------------------------------------------------|------------------------------|----------------------------|---------------------------|---------------------------|-----------------------------|
|                               | <b>Total</b>                                                              | <b>Persistently inactive</b> | <b>Persistently Active</b> | <b>Active to inactive</b> | <b>Inactive to active</b> |                             |
|                               | <b>Outcome change Tromsø 5-6 (2001 to 2007-08)</b>                        |                              |                            |                           |                           |                             |
| <i>Total (n)</i>              | 2212                                                                      | 884                          | 985                        | 166                       | 177                       |                             |
| BMI (kg/m <sup>2</sup> )      | Mean                                                                      | 0.12                         | 0.12                       | 0.15                      | 0.07                      | 0.98                        |
|                               | 95% CI                                                                    | -0.004 to 0.24               | 0.01 to 0.24               | -0.13 to 0.43             | -0.20 to 0.35             |                             |
| Weight (kg)                   | Mean                                                                      | 0.31                         | 0.37                       | 0.42                      | 0.27                      | 0.99                        |
| (n=2213)                      | 95% CI                                                                    | -0.04 to 0.66                | 0.04 to 0.71               | -0.38 to 1.22             | -0.50 to 1.04             |                             |
|                               |                                                                           | (n=885)                      |                            |                           |                           |                             |
| <b>Sex</b>                    | <b>Change occupational physical activity Tromsø 4-5 (1994-95 to 2001)</b> |                              |                            |                           |                           | <b>P<sub>equality</sub></b> |
|                               | <b>Total</b>                                                              | <b>Persistently inactive</b> | <b>Persistently Active</b> | <b>Active to inactive</b> | <b>Inactive to active</b> |                             |
|                               | <b>Outcome change Tromsø 5-6 (2001 to 2007-08)</b>                        |                              |                            |                           |                           |                             |
| <i>Women (n)</i>              | 1183                                                                      | 455                          | 585                        | 68                        | 85                        |                             |
| BMI (kg/m <sup>2</sup> )      | Mean                                                                      | 0.31                         | 0.07                       | 0.18                      | 0.04                      | 0.27                        |
|                               | 95% CI                                                                    | 0.12 to 0.50                 | -0.09 to 0.24              | -0.31 to 0.66             | -0.40 to 0.47             |                             |
| Weight (kg)                   | Mean                                                                      | 0.86                         | 0.22                       | 0.43                      | 0.18                      | 0.29                        |
|                               | 95% CI                                                                    | 0.35 to 1.38                 | -0.23 to 0.67              | -0.88 to 1.74             | -0.98 to 1.35             |                             |
| <i>Men (n)</i>                | 1029                                                                      | 439                          | 400                        | 98                        | 92                        |                             |
| BMI (kg/m <sup>2</sup> )      | Mean                                                                      | -0.09                        | 0.22                       | 0.10                      | 0.10                      | 0.07                        |
|                               | 95% CI                                                                    | -0.25 to 0.06                | 0.06 to 0.39               | -0.22 to 0.41             | -0.22 to 0.43             |                             |
| Weight (kg)                   | Mean                                                                      | -0.28                        | 0.65                       | 0.34                      | 0.30                      | 0.09                        |
| (n=1030)                      | 95% CI                                                                    | -0.76 to 0.20                | 0.15 to 1.15               | -0.63 to 1.31             | -0.70 to 1.31             |                             |
|                               |                                                                           | (n=440)                      |                            |                           |                           |                             |
| <b>Birth year</b>             | <b>Change occupational physical activity Tromsø 4-5 (1994-95 to 2001)</b> |                              |                            |                           |                           | <b>P<sub>equality</sub></b> |
|                               | <b>Total</b>                                                              | <b>Persistently inactive</b> | <b>Persistently Active</b> | <b>Active to inactive</b> | <b>Inactive to active</b> |                             |
|                               | <b>Outcome change Tromsø 5-6 (2001 to 2007-08)</b>                        |                              |                            |                           |                           |                             |
| <i>≤1939 (n)</i>              | 761                                                                       | 288                          | 342                        | 67                        | 64                        |                             |
| BMI (kg/m <sup>2</sup> )      | Mean                                                                      | -0.15                        | -0.13                      | -0.02                     | -0.42                     | 0.56                        |
|                               | 95% CI                                                                    | -0.35 to 0.05                | -0.31 to 0.05              | -0.42 to 0.39             | -0.83 to 0.00             |                             |
| Weight (kg)                   | Mean                                                                      | -0.46                        | -0.42                      | 0.004                     | -1.16                     | 0.57                        |
|                               | 95% CI                                                                    | -1.04 to 0.11                | -0.94 to 0.10              | -1.14 to 1.15             | -2.34 to 0.02             |                             |
| <i>1940-1949 (n)</i>          | 950                                                                       | 392                          | 430                        | 64                        | 64                        |                             |

|                                                                           |              |                              |                            |                           |                           |                             |
|---------------------------------------------------------------------------|--------------|------------------------------|----------------------------|---------------------------|---------------------------|-----------------------------|
| BMI (kg/m <sup>2</sup> )                                                  | Mean         | 0.06                         | 0.07                       | -0.002                    | 0.24                      | 0.89                        |
|                                                                           | 95% CI       | -0.13 to 0.25                | -0.11 to 0.25              | -0.46 to 0.46             | -0.22 to 0.71             |                             |
| Weight change (kg)                                                        | Mean         | 0.14                         | 0.17                       | -0.05                     | 0.84                      | 0.77                        |
|                                                                           | 95% CI       | -0.39 to 0.67                | -0.34 to 0.68              | -1.35 to 1.25             | -0.47 to 2.14             |                             |
| ≥1950 (n)                                                                 |              | 501                          | 204                        | 213                       | 35                        | 49                          |
| BMI (kg/m <sup>2</sup> )                                                  | Mean         | 0.66                         | 0.62                       | 0.57                      | 0.51                      | 0.97                        |
|                                                                           | 95% CI       | 0.39 to 0.94                 | 0.35 to 0.90               | -0.10 to 1.24             | -0.05 to 1.08             |                             |
| Weight (kg)                                                               | Mean         | 1.90                         | 1.93                       | 1.62                      | 1.46                      | 0.96                        |
| (n=502)                                                                   | 95% CI       | 1.10 to 2.69                 | 1.13 to 2.72               | -0.30 to 3.55             | -0.16 to 3.08             |                             |
|                                                                           |              | (n=205)                      |                            |                           |                           |                             |
| <b>Change occupational physical activity Tromsø 4-5 (1994-95 to 2001)</b> |              |                              |                            |                           |                           |                             |
| <b>Smoking</b>                                                            | <b>Total</b> | <b>Persistently inactive</b> | <b>Persistently Active</b> | <b>Active to inactive</b> | <b>Inactive to active</b> | <b>P<sub>equality</sub></b> |
| <b>Outcome change Tromsø 5-6 (2001 to 2007-08)</b>                        |              |                              |                            |                           |                           |                             |
| <i>Smoker (n)</i>                                                         | 579          | 213                          | 277                        | 46                        | 43                        |                             |
| BMI (kg/m <sup>2</sup> )                                                  | Mean         | 0.47                         | 0.61                       | 0.52                      | 0.34                      | 0.82                        |
|                                                                           | 95% CI       | 0.18 to 0.75                 | 0.36 to 0.86               | -0.08 to 1.13             | -0.28 to 0.97             |                             |
| Weight (kg)                                                               | Mean         | 1.26                         | 1.81                       | 1.54                      | 0.95                      | 0.71                        |
| (n=580)                                                                   | 95% CI       | 0.44 to 2.07                 | 1.10 to 2.53               | -0.19 to 3.27             | 0.83 to 2.74              |                             |
|                                                                           |              | (n=214)                      |                            |                           |                           |                             |
| <i>Previous (n)</i>                                                       | 843          | 355                          | 350                        | 70                        | 68                        |                             |
| BMI (kg/m <sup>2</sup> )                                                  | Mean         | -0.01                        | -0.10                      | -0.14                     | -0.53                     | 0.20                        |
|                                                                           | 95% CI       | -0.20 to 0.18                | -0.29 to 0.10              | -0.57 to 0.29             | -0.96 to -0.10            |                             |
| Weight (kg)                                                               | Mean         | -0.03                        | -0.32                      | -0.40                     | -1.43                     | 0.24                        |
|                                                                           | 95% CI       | -0.58 to 0.51                | 0.87 to 0.24               | -1.63 to 0.82             | -2.67 to -0.20            |                             |
| <i>Never smoker (n)</i>                                                   | 790          | 316                          | 358                        | 50                        | 66                        |                             |
| BMI (kg/m <sup>2</sup> )                                                  | Mean         | 0.01                         | -0.01                      | 0.16                      | 0.52                      | 0.11                        |
|                                                                           | 95% CI       | -0.17 to 0.20                | -0.19 to 0.16              | -0.30 to 0.62             | 0.12 to 0.92              |                             |
| Weight (kg)                                                               | Mean         | -0.01                        | -0.001                     | 0.40                      | 1.58                      | 0.07                        |
|                                                                           | 95% CI       | -0.53 to 0.51                | -0.49 to 0.49              | -0.89 to 1.69             | 0.46 to 2.70              |                             |
| <b>Change occupational physical activity Tromsø 4-5 (1994-95 to 2001)</b> |              |                              |                            |                           |                           |                             |
| <b>Education</b>                                                          | <b>Total</b> | <b>Persistently inactive</b> | <b>Persistently Active</b> | <b>Active to inactive</b> | <b>Inactive to active</b> | <b>P<sub>equality</sub></b> |
| <b>Outcome change Tromsø 5-6 (2001 to 2007-08)</b>                        |              |                              |                            |                           |                           |                             |
| <i>Primary school (n)</i>                                                 | 782          | 205                          | 461                        | 50                        | 66                        |                             |
| BMI (kg/m <sup>2</sup> )                                                  | Mean         | 0.19                         | -0.02                      | 0.03                      | 0.01                      | 0.62                        |
|                                                                           | 95% CI       | -0.07 to 0.46                | -0.20 to 0.15              | -0.51 to 0.57             | 0.45 to 0.48              |                             |
| Weight (kg)                                                               | Mean         | 0.50                         | -0.06                      | 0.14                      | 0.13                      | 0.67                        |
|                                                                           | 95% CI       | -0.23 to 1.24                | -0.55 to 0.43              | -1.36 to 1.64             | -1.17 to 1.43             |                             |
| <i>High School (n)</i>                                                    | 665          | 279                          | 285                        | 53                        | 48                        |                             |
| BMI (kg/m <sup>2</sup> )                                                  | Mean         | 0.17                         | 0.16                       | 0.07                      | 0.32                      | 0.91                        |
|                                                                           | 95% CI       | -0.03 to 0.38                | -0.04 to 0.36              | -0.39 to 0.54             | -0.18 to 0.82             |                             |
| Weight change (kg)                                                        | Mean         | 0.46                         | 0.43                       | 0.18                      | 0.96                      | 0.89                        |
|                                                                           | 95% CI       | -0.13 to 1.05                | -0.15 to 1.01              | -1.16 to 1.53             | -0.47 to 2.39             |                             |
| <i>University &lt;4 years (n)</i>                                         | 364          | 199                          | 107                        | 33                        | 25                        |                             |
| BMI (kg/m <sup>2</sup> )                                                  | Mean         | 0.19                         | 0.40                       | 0.09                      | 0.08                      | 0.70                        |
|                                                                           | 95% CI       | -0.05 to 0.44                | 0.06 to 0.74               | -0.52 to 0.69             | -0.62 to 0.78             |                             |
| Weight (kg)                                                               | Mean         | 0.53                         | 1.28                       | 0.22                      | 0.28                      | 0.56                        |
|                                                                           | 95% CI       | -0.18 to 1.23                | 0.31 to 2.24               | -1.52 to 1.96             | -1.72 to 2.28             |                             |
| <i>University &gt;4 years (n)</i>                                         | 401          | 201                          | 132                        | 30                        | 38                        |                             |
| BMI (kg/m <sup>2</sup> )                                                  | Mean         | -0.05                        | 0.26                       | 0.51                      | -0.16                     | 0.26                        |
|                                                                           | 95% CI       | -0.32 to 0.23                | -0.8 to 0.60               | -0.17 to 1.19             | -0.77 to 0.45             |                             |
| Weight (kg)                                                               | Mean         | -0.11                        | 0.75                       | 1.57                      | -0.52                     | 0.25                        |
| (n=402)                                                                   | 95% CI       | -0.91 to 0.69                | -0.26 to 1.75              | -0.43 to 3.56             | -2.31 to 1.27             |                             |
|                                                                           |              | (n=202)                      |                            |                           |                           |                             |

Data are adjusted for sex, birth year, smoking, education and BMI or weight at Tromsø 5, and shown as adjusted mean and 95% CI. CI=confidence interval, BMI=body mass index, P<sub>equality</sub>=main differences between groups.

**Supplementary Table 7.** BMI and weight change by occupational physical activity change for the Tromsø 3-5 sample in total and in strata of sex, birth year, smoking and education.

| Tromsø 3-5 (1986-2001)                      | Change occupational physical activity Tromsø 3-4 (1986-87 to 1994-95) |                       |                     |                    |                    | P <sub>equality</sub> |
|---------------------------------------------|-----------------------------------------------------------------------|-----------------------|---------------------|--------------------|--------------------|-----------------------|
|                                             | Total                                                                 | Persistently inactive | Persistently Active | Active to inactive | Inactive to active |                       |
| Outcome change Tromsø 4-5 (1994-95 to 2001) |                                                                       |                       |                     |                    |                    |                       |
| Total (n)                                   | 3827                                                                  | 1315                  | 1915                | 223                | 374                |                       |
| BMI (kg/m <sup>2</sup> )                    | Mean                                                                  | 0.96                  | 0.96                | 1.02               | 0.91               | 0.90                  |
|                                             | 95% CI                                                                | 0.86 to 1.05          | 0.87 to 1.04        | 0.79 to 1.25       | 0.73 to 1.09       |                       |
| Weight (kg)                                 | Mean                                                                  | 2.71                  | 2.70                | 2.95               | 2.59               | 0.87                  |
|                                             | 95% CI                                                                | 2.44 to 2.99          | 2.47 to 2.93        | 2.29 to 3.60       | 2.08 to 3.09       |                       |
| Sex                                         | Change occupational physical activity Tromsø 3-4 (1986-87 to 1994-95) |                       |                     |                    |                    | P <sub>equality</sub> |
|                                             | Total                                                                 | Persistently inactive | Persistently Active | Active to inactive | Inactive to active |                       |
| Outcome change Tromsø 4-5 (1994-95 to 2001) |                                                                       |                       |                     |                    |                    |                       |
| Women (n)                                   | 2021                                                                  | 637                   | 1069                | 122                | 193                |                       |
| BMI (kg/m <sup>2</sup> )                    | Mean                                                                  | 1.22                  | 1.13                | 1.21               | 1.07               | 0.70                  |
|                                             | 95% CI                                                                | 1.07 to 1.37          | 1.01 to 1.25        | 0.86 to 1.55       | 0.79 to 1.34       |                       |
| Weight (kg)                                 | Mean                                                                  | 3.29                  | 3.01                | 3.28               | 2.85               | 0.63                  |
|                                             | 95% CI                                                                | 2.89 to 3.69          | 2.70 to 3.32        | 2.36 to 4.19       | 2.12 to 3.57       |                       |
| Men (n)                                     | 1806                                                                  | 678                   | 846                 | 101                | 181                |                       |
| BMI (kg/m <sup>2</sup> )                    | Mean                                                                  | 0.66                  | 0.77                | 0.81               | 0.74               | 0.59                  |
|                                             | 95% CI                                                                | 0.54 to 0.78          | 0.66 to 0.88        | 0.51 to 1.11       | 0.51 to 0.97       |                       |
| Weight (kg)                                 | Mean                                                                  | 2.08                  | 2.37                | 2.59               | 2.32               | 0.65                  |
|                                             | 95% CI                                                                | 1.70 to 2.46          | 2.03 to 2.71        | 1.64 to 3.53       | 1.61 to 3.03       |                       |
| Birth year                                  | Change occupational physical activity Tromsø 3-4 (1986-87 to 1994-95) |                       |                     |                    |                    | P <sub>equality</sub> |
|                                             | Total                                                                 | Persistently inactive | Persistently Active | Active to inactive | Inactive to active |                       |
| Outcome change Tromsø 4-5 (1994-95 to 2001) |                                                                       |                       |                     |                    |                    |                       |
| ≤1939 (n)                                   | 1829                                                                  | 624                   | 951                 | 100                | 154                |                       |
| BMI (kg/m <sup>2</sup> )                    | Mean                                                                  | 0.51                  | 0.58                | 0.73               | 0.64               | 0.55                  |
|                                             | 95% CI                                                                | 0.37 to 0.64          | 0.47 to 0.69        | 0.40 to 1.06       | 0.38 to 0.91       |                       |
| Weight (kg)                                 | Mean                                                                  | 1.40                  | 1.63                | 2.13               | 1.81               | 0.47                  |
|                                             | 95% CI                                                                | 1.01 to 1.79          | 1.31 to 1.94        | 1.18 to 3.08       | 1.05 to 2.57       |                       |
| 1940-1949 (n)                               | 1216                                                                  | 445                   | 585                 | 73                 | 113                |                       |
| BMI (kg/m <sup>2</sup> )                    | Mean                                                                  | 1.23                  | 1.23                | 1.16               | 1.18               | 0.98                  |
|                                             | 95% CI                                                                | 1.06 to 1.40          | 1.09 to 1.38        | 0.74 to 1.57       | 0.84 to 1.51       |                       |
| Weight change (kg)                          | Mean                                                                  | 3.48                  | 3.47                | 3.30               | 3.34               | 0.99                  |
|                                             | 95% CI                                                                | 3.00 to 3.95          | 3.06 to 3.89        | 2.14 to 4.45       | 2.41 to 4.27       |                       |
| ≥1950 (n)                                   | 782                                                                   | 246                   | 379                 | 50                 | 107                |                       |
| BMI (kg/m <sup>2</sup> )                    | Mean                                                                  | 1.56                  | 1.40                | 1.55               | 1.24               | 0.48                  |
|                                             | 95% CI                                                                | 1.32 to 1.79          | 1.21 to 1.59        | 1.03 to 2.07       | 0.89 to 1.59       |                       |
| Weight (kg)                                 | Mean                                                                  | 4.53                  | 4.03                | 4.47               | 3.60               | 0.44                  |
|                                             | 95% CI                                                                | 3.85 to 5.20          | 3.48 to 4.57        | 2.98 to 5.96       | 2.59 to 4.61       |                       |
| Smoking                                     | Change occupational physical activity Tromsø 3-4 (1986-87 to 1994-95) |                       |                     |                    |                    | P <sub>equality</sub> |
|                                             | Total                                                                 | Persistently inactive | Persistently Active | Active to inactive | Inactive to active |                       |
| Outcome change Tromsø 4-5 (1994-95 to 2001) |                                                                       |                       |                     |                    |                    |                       |
| Smoker (n)                                  | 1263                                                                  | 383                   | 679                 | 84                 | 117                |                       |
| BMI (kg/m <sup>2</sup> )                    | Mean                                                                  | 0.99                  | 0.95                | 0.70               | 1.20               | 0.34                  |
|                                             | 95% CI                                                                | 0.79 to 1.19          | 0.80 to 1.10        | 0.28 to 1.12       | 0.85 to 1.56       |                       |
| Weight (kg)                                 | Mean                                                                  | 2.80                  | 2.68                | 2.07               | 3.43               | 0.37                  |
|                                             | 95% CI                                                                | 0.23 to 3.36          | 2.26 to 3.10        | 0.88 to 3.25       | 2.42 to 4.44       |                       |
| Previous (n)                                | 390                                                                   | 161                   | 171                 | 20                 | 38                 |                       |
| BMI (kg/m <sup>2</sup> )                    | Mean                                                                  | 0.96                  | 1.21                | 1.51               | 0.75               | 0.33                  |
|                                             | 95% CI                                                                | 0.66 to 1.26          | 0.92 to 1.51        | 0.67 to 2.34       | 0.14 to 1.37       |                       |
| Weight (kg)                                 | Mean                                                                  | 2.78                  | 3.47                | 4.61               | 2.10               | 0.27                  |
|                                             | 95% CI                                                                | 1.91 to 3.64          | 2.62 to 4.32        | 2.19 to 7.03       | 0.32 to 3.87       |                       |
| Never smoker (n)                            | 2174                                                                  | 771                   | 1065                | 119                | 219                |                       |

|                                                                              |              |                              |                            |                           |                           |                             |
|------------------------------------------------------------------------------|--------------|------------------------------|----------------------------|---------------------------|---------------------------|-----------------------------|
| BMI (kg/m <sup>2</sup> )                                                     | Mean         | 0.94                         | 0.91                       | 1.16                      | 0.79                      | 0.23                        |
|                                                                              | 95% CI       | 0.83 to 1.06                 | 0.82 to 1.01               | 0.87 to 1.45              | 0.57 to 1.00              |                             |
| Weight (kg)                                                                  | Mean         | 2.67                         | 2.58                       | 3.26                      | 2.25                      | 0.27                        |
|                                                                              | 95% CI       | 2.34 to 3.00                 | 2.30 to 2.86               | 2.44 to 4.08              | 1.64 to 2.85              |                             |
| <b>Change occupational physical activity Tromsø 3-4 (1986-87 to 1994-95)</b> |              |                              |                            |                           |                           |                             |
| <b>Education</b>                                                             | <b>Total</b> | <b>Persistently inactive</b> | <b>Persistently Active</b> | <b>Active to inactive</b> | <b>Inactive to active</b> | <b>P<sub>equality</sub></b> |
| <b>Outcome change Tromsø 4-5 (1994-95 to 2001)</b>                           |              |                              |                            |                           |                           |                             |
| <i>Primary school (n)</i>                                                    | 1456         | 280                          | 980                        | 70                        | 126                       |                             |
| BMI (kg/m <sup>2</sup> )                                                     | Mean         | 0.91                         | 0.92                       | 0.59                      | 1.07                      | 0.38                        |
|                                                                              | 95% CI       | 0.69 to 1.13                 | 0.80 to 1.04               | 0.15 to 1.03              | 0.75 to 1.40              |                             |
| Weight (kg)                                                                  | Mean         | 0.55                         | 2.54                       | 1.69                      | 3.06                      | 0.37                        |
|                                                                              | 95% CI       | 1.94 to 3.16                 | 2.21 to 2.89               | 0.48 to 2.91              | 2.15 to 3.97              |                             |
| <i>High School (n)</i>                                                       | 1408         | 565                          | 621                        | 80                        | 142                       |                             |
| BMI (kg/m <sup>2</sup> )                                                     | Mean         | 1.00                         | 1.04                       | 1.45                      | 0.90                      | 0.14                        |
|                                                                              | 95% CI       | 0.85 to 1.14                 | 0.91 to 1.18               | 1.06 to 1.84              | 0.61 to 1.19              |                             |
| Weight change (kg)                                                           | Mean         | 2.82                         | 2.98                       | 4.17                      | 2.53                      | 0.11                        |
|                                                                              | 95% CI       | 2.40 to 3.24                 | 2.69 to 3.38               | 3.07 to 5.26              | 1.71 to 3.36              |                             |
| <i>University &lt;4 years (n)</i>                                            | 551          | 279                          | 169                        | 37                        | 66                        |                             |
| BMI (kg/m <sup>2</sup> )                                                     | Mean         | 0.88                         | 1.04                       | 0.95                      | 0.52                      | 0.22                        |
|                                                                              | 95% CI       | 0.68 to 1.09                 | 0.78 to 1.30               | 0.40 to 1.50              | 0.11 to 0.93              |                             |
| Weight (kg)                                                                  | Mean         | 2.60                         | 2.95                       | 2.86                      | 1.56                      | 0.29                        |
|                                                                              | 95% CI       | 2.00 to 3.19                 | 2.18 to 3.72               | 1.23 to 4.48              | 0.35 to 2.77              |                             |
| <i>University &gt;4 years (n)</i>                                            | 412          | 191                          | 145                        | 36                        | 40                        |                             |
| BMI (kg/m <sup>2</sup> )                                                     | Mean         | 0.98                         | 0.72                       | 0.98                      | 1.12                      | 0.36                        |
|                                                                              | 95% CI       | 0.76 to 1.20                 | 0.48 to 0.98               | 0.50 to 1.46              | 0.67 to 1.58              |                             |
| Weight (kg)                                                                  | Mean         | 2.87                         | 2.12                       | 2.76                      | 3.18                      | 0.41                        |
|                                                                              | 95% CI       | 2.22 to 3.51                 | 1.39 to 2.86               | 1.36 to 4.17              | 1.85 to 4.51              |                             |

Data are adjusted for sex, birth year, smoking, education and BMI or weight at Tromsø 4, and shown as adjusted mean and 95% CI. CI=confidence interval, BMI=body mass index, P<sub>equality</sub>=main differences between groups.

**Supplementary Table 8.** BMI and weight change by occupational physical activity change for the Tromsø 2-4 sample in total and in strata of sex, birth year, smoking, education and leisure time physical activity change.

|                                                                              |                                                                              |                              |                            |                           |                           |                             |
|------------------------------------------------------------------------------|------------------------------------------------------------------------------|------------------------------|----------------------------|---------------------------|---------------------------|-----------------------------|
| <b>Tromsø 2-4 (1979-95)</b>                                                  | <b>Change occupational physical activity Tromsø 2-3 (1979-80 to 1986-87)</b> |                              |                            |                           |                           | <b>P<sub>equality</sub></b> |
|                                                                              | <b>Total</b>                                                                 | <b>Persistently inactive</b> | <b>Persistently Active</b> | <b>Active to inactive</b> | <b>Inactive to active</b> |                             |
| <b>Outcome change Tromsø 3-4 (1986-87 to 1994-95)</b>                        |                                                                              |                              |                            |                           |                           |                             |
| <i>Total (n)</i>                                                             | 9679                                                                         | 2512                         | 5179                       | 665                       | 1323                      |                             |
| BMI (kg/m <sup>2</sup> )                                                     | Mean                                                                         | 1.12                         | 1.15                       | 1.12                      | 1.07                      | 0.50                        |
|                                                                              | 95% CI                                                                       | 1.05 to 1.19                 | 1.10 to 1.20               | 0.99 to 1.26              | 0.98 to 1.17              |                             |
| Weight (kg)                                                                  | Mean                                                                         | 3.20                         | 3.30                       | 3.27                      | 3.09                      | 0.58                        |
|                                                                              | 95% CI                                                                       | 3.00 to 3.40                 | 3.16 to 3.43               | 2.89 to 3.65              | 2.82 to 3.36              |                             |
| <b>Change occupational physical activity Tromsø 2-3 (1979-80 to 1986-87)</b> |                                                                              |                              |                            |                           |                           |                             |
| <b>Sex</b>                                                                   | <b>Total</b>                                                                 | <b>Persistently inactive</b> | <b>Persistently Active</b> | <b>Active to inactive</b> | <b>Inactive to active</b> | <b>P<sub>equality</sub></b> |
| <b>Outcome change Tromsø 3-4 (1986-87 to 1994-95)</b>                        |                                                                              |                              |                            |                           |                           |                             |
| <i>Women (n)</i>                                                             | 4838                                                                         | 1062                         | 2788                       | 294                       | 694                       |                             |
| BMI (kg/m <sup>2</sup> )                                                     | Mean                                                                         | 1.45                         | 1.43                       | 1.37                      | 1.36                      | 0.77                        |
|                                                                              | 95% CI                                                                       | 1.33 to 1.57                 | 1.35 to 1.49               | 1.15 to 1.59              | 1.21 to 1.50              |                             |
| Weight (kg)                                                                  | Mean                                                                         | 3.93                         | 3.82                       | 3.73                      | 3.68                      | 0.78                        |
|                                                                              | 95% CI                                                                       | 3.62 to 4.24                 | 3.63 to 4.02               | 3.14 to 4.33              | 3.29 to 4.06              |                             |
| <i>Men (n)</i>                                                               | 4859                                                                         | 1458                         | 2397                       | 372                       | 632                       |                             |
| BMI (kg/m <sup>2</sup> )                                                     | Mean                                                                         | 0.80                         | 0.88                       | 0.89                      | 0.78                      | 0.30                        |
|                                                                              | 95% CI                                                                       | 0.72 to 0.88                 | 0.82 to 0.95               | 0.73 to 1.04              | 0.66 to 0.90              |                             |
| Weight (kg)                                                                  | Mean                                                                         | 2.54                         | 2.77                       | 2.83                      | 2.49                      | 0.37                        |
|                                                                              | 95% CI                                                                       | 2.28 to 2.80                 | 2.57 to 2.97               | 2.34 to 3.32              | 2.12 to 2.86              |                             |
| <b>Change occupational physical activity Tromsø 2-3 (1979-80 to 1986-87)</b> |                                                                              |                              |                            |                           |                           |                             |

| Birth year                                                                   | Total                                          | Persistently inactive | Persistently Active | Active to inactive | Inactive to active | P <sub>equality</sub> |
|------------------------------------------------------------------------------|------------------------------------------------|-----------------------|---------------------|--------------------|--------------------|-----------------------|
|                                                                              | Outcome change Tromsø 3-4 (1986-87 to 1994-95) |                       |                     |                    |                    |                       |
| $\leq 1929$ (n)                                                              | 549                                            | 174                   | 258                 | 45                 | 72                 |                       |
| BMI (kg/m <sup>2</sup> )                                                     | Mean                                           | 0.02                  | 0.38                | 0.28               | 0.06               | 0.15                  |
|                                                                              | 95% CI                                         | -0.23 to 0.28         | 0.18 to 0.57        | -0.18 to 0.74      | -0.30 to 0.42      |                       |
| Weight (kg)                                                                  | Mean                                           | 0.10                  | 1.16                | 0.87               | 0.11               | 0.14                  |
|                                                                              | 95% CI                                         | -0.67 to 0.87         | 0.56 to 1.76        | -0.54 to 2.27      | -1.00 to 1.22      |                       |
| 1930-1939 (n)                                                                | 2666                                           | 675                   | 1532                | 144                | 315                |                       |
| BMI (kg/m <sup>2</sup> )                                                     | Mean                                           | 0.81                  | 0.88                | 0.83               | 0.72               | 0.51                  |
|                                                                              | 95% CI                                         | 0.68 to 0.95          | 0.79 to 0.97        | 0.55 to 1.12       | 0.52 to 0.91       |                       |
| Weight (kg)                                                                  | Mean                                           | 2.32                  | 2.45                | 2.42               | 2.01               | 0.54                  |
|                                                                              | 95% CI                                         | 1.93 to 2.70          | 2.19 to 2.70        | 1.61 to 3.22       | 1.46 to 2.55       |                       |
| 1940-1949 (n)                                                                | 3849                                           | 1071                  | 2010                | 225                | 543                |                       |
| BMI (kg/m <sup>2</sup> )                                                     | Mean                                           | 1.30                  | 1.26                | 1.20               | 1.18               | 0.56                  |
|                                                                              | 95% CI                                         | 1.19 to 1.41          | 1.19 to 1.34        | 0.97 to 1.43       | 1.03 to 1.32       |                       |
| Weight change (kg)                                                           | Mean                                           | 3.72                  | 3.60                | 3.48               | 3.39               | 0.64                  |
|                                                                              | 95% CI                                         | 3.41 to 4.02          | 3.38 to 3.82        | 2.82 to 4.13       | 2.97 to 3.81       |                       |
| $\geq 1950$ (n)                                                              | 2615                                           | 592                   | 1379                | 251                | 393                |                       |
| BMI (kg/m <sup>2</sup> )                                                     | Mean                                           | 1.36                  | 1.43                | 1.50               | 1.47               | 0.67                  |
|                                                                              | 95% CI                                         | 1.22 to 1.50          | 1.34 to 1.53        | 1.29 to 1.72       | 1.30 to 1.64       |                       |
| Weight (kg)                                                                  | Mean                                           | 3.97                  | 4.16                | 4.39               | 4.30               | 0.66                  |
|                                                                              | 95% CI                                         | 3.56 to 4.39          | 3.89 to 4.43        | 3.75 to 5.02       | 3.80 to 4.80       |                       |
| <b>Change occupational physical activity Tromsø 2-3 (1979-80 to 1986-87)</b> |                                                |                       |                     |                    |                    |                       |
| Smoking                                                                      | Total                                          | Persistently inactive | Persistently Active | Active to inactive | Inactive to active | P <sub>equality</sub> |
|                                                                              | Outcome change Tromsø 3-4 (1986-87 to 1994-95) |                       |                     |                    |                    |                       |
| Smoker (n)                                                                   | 4221                                           | 1015                  | 2351                | 279                | 576                |                       |
| BMI (kg/m <sup>2</sup> )                                                     | Mean                                           | 1.15                  | 1.16                | 1.12               | 1.01               | 0.32                  |
|                                                                              | 95% CI                                         | 1.03 to 1.26          | 1.09 to 1.24        | 0.91 to 1.34       | 0.86 to 1.16       |                       |
| Weight (kg)                                                                  | Mean                                           | 3.28                  | 3.35                | 3.31               | 2.92               | 0.38                  |
|                                                                              | 95% CI                                         | 2.95 to 3.61          | 3.14 to 3.57        | 2.69 to 3.92       | 2.50 to 3.35       |                       |
| Previous (n)                                                                 | 754                                            | 200                   | 375                 | 57                 | 122                |                       |
| BMI (kg/m <sup>2</sup> )                                                     | Mean                                           | 0.88                  | 0.90                | 1.21               | 0.99               | 0.60                  |
|                                                                              | 95% CI                                         | 0.62 to 1.13          | 0.70 to 1.08        | 0.74 to 1.69       | 0.67 to 1.31       |                       |
| Weight (kg)                                                                  | Mean                                           | 2.52                  | 2.57                | 3.66               | 2.96               | 0.45                  |
|                                                                              | 95% CI                                         | 1.78 to 3.26          | 2.03 to 3.11        | 2.29 to 5.03       | 2.02 to 3.89       |                       |
| Never smoker (n)                                                             | 4704                                           | 1297                  | 2453                | 329                | 625                |                       |
| BMI (kg/m <sup>2</sup> )                                                     | Mean                                           | 1.14                  | 1.18                | 1.11               | 1.14               | 0.86                  |
|                                                                              | 95% CI                                         | 1.05 to 1.23          | 1.11 to 1.24        | 0.93 to 1.29       | 1.02 to 1.27       |                       |
| Weight (kg)                                                                  | Mean                                           | 3.28                  | 3.34                | 3.16               | 3.26               | 0.91                  |
|                                                                              | 95% CI                                         | 3.01 to 3.54          | 3.16 to 3.53        | 2.65 to 3.67       | 2.89 to 3.63       |                       |
| <b>Change occupational physical activity Tromsø 2-3 (1979-80 to 1986-87)</b> |                                                |                       |                     |                    |                    |                       |
| Education                                                                    | Total                                          | Persistently inactive | Persistently Active | Active to inactive | Inactive to active | P <sub>equality</sub> |
|                                                                              | Outcome change Tromsø 3-4 (1986-87 to 1994-95) |                       |                     |                    |                    |                       |
| Primary school (n)                                                           | 4324                                           | 663                   | 2929                | 221                | 511                |                       |
| BMI (kg/m <sup>2</sup> )                                                     | Mean                                           | 1.03                  | 1.05                | 1.12               | 0.93               | 0.53                  |
|                                                                              | 95% CI                                         | 0.89 to 1.16          | 0.98 to 1.11        | 0.88 to 1.36       | 0.78 to 1.09       |                       |
| Weight (kg)                                                                  | Mean                                           | 2.93                  | 2.93                | 3.23               | 2.62               | 0.47                  |
|                                                                              | 95% CI                                         | 2.54 to 3.32          | 2.74 to 3.11        | 2.55 to 3.90       | 2.17 to 3.06       |                       |
| High School (n)                                                              | 2936                                           | 904                   | 1364                | 211                | 457                |                       |
| BMI (kg/m <sup>2</sup> )                                                     | Mean                                           | 1.16                  | 1.23                | 1.22               | 1.14               | 0.68                  |
|                                                                              | 95% CI                                         | 1.05 to 1.28          | 1.14 to 1.33        | 0.98 to 1.45       | 0.98 to 1.29       |                       |
| Weight change (kg)                                                           | Mean                                           | 3.33                  | 3.56                | 3.53               | 3.27               | 0.63                  |
|                                                                              | 95% CI                                         | 3.01 to 3.66          | 3.29 to 3.82        | 2.86 to 4.21       | 2.82 to 3.73       |                       |
| University <4 years (n)                                                      | 1380                                           | 503                   | 531                 | 117                | 229                |                       |
| BMI (kg/m <sup>2</sup> )                                                     | Mean                                           | 1.31                  | 1.23                | 1.29               | 1.15               | 0.67                  |
|                                                                              | 95% CI                                         | 1.16 to 1.47          | 1.09 to 1.38        | 0.98 to 1.60       | 0.93 to 1.37       |                       |
| Weight (kg)                                                                  | Mean                                           | 3.86                  | 3.60                | 3.84               | 3.43               | 0.69                  |



|                                                                              |                                                       |                              |                            |                           |                           |                             |
|------------------------------------------------------------------------------|-------------------------------------------------------|------------------------------|----------------------------|---------------------------|---------------------------|-----------------------------|
|                                                                              | 95% CI                                                | 3.42 to 3.31                 | 3.17 to 4.03               | 2.94 to 4.74              | 2.78 to 4.08              |                             |
| <i>University &gt;4 years (n)</i>                                            |                                                       | 1039                         | 442                        | 355                       | 116                       | 126                         |
| BMI (kg/m <sup>2</sup> )                                                     | Mean                                                  | 1.06                         | 1.29                       | 1.02                      | 1.38                      | 0.04                        |
|                                                                              | 95% CI                                                | 0.92 to 1.20                 | 1.14 to 1.45               | 0.75 to 1.28              | 1.12 to 1.63              |                             |
| Weight (kg)                                                                  | Mean                                                  | 3.12                         | 3.87                       | 2.98                      | 4.09                      | 0.02                        |
|                                                                              | 95% CI                                                | 2.70 to 3.54                 | 3.41 to 4.33               | 2.18 to 3.78              | 3.33 to 4.84              |                             |
| <b>Change occupational physical activity Tromsø 2-3 (1979-80 to 1986-87)</b> |                                                       |                              |                            |                           |                           |                             |
| <b>Leisure time physical activity change Tromsø 2-3 (1979-87)</b>            | <b>Total</b>                                          | <b>Persistently inactive</b> | <b>Persistently Active</b> | <b>Active to inactive</b> | <b>Inactive to active</b> | <b>P<sub>equality</sub></b> |
|                                                                              | <b>Outcome change Tromsø 3-4 (1986-87 to 1994-95)</b> |                              |                            |                           |                           |                             |
| <i>Persistently inactive (n)</i>                                             | 890                                                   | 334                          | 352                        | 60                        | 144                       |                             |
| BMI (kg/m <sup>2</sup> )                                                     | Mean                                                  | 1.12                         | 1.04                       | 1.52                      | 1.03                      | 0.35                        |
|                                                                              | 95% CI                                                | 0.91 to 1.33                 | 0.84 to 1.25               | 1.03 to 2.01              | 0.71 to 1.35              |                             |
| Weight (kg)                                                                  | Mean                                                  | 3.20                         | 2.93                       | 4.40                      | 2.94                      | 0.30                        |
|                                                                              | 95% CI                                                | 2.58 to 3.81                 | 2.33 to 3.52               | 2.98 to 5.81              | 2.02 to 3.85              |                             |
| <i>Persistently active (n)</i>                                               | 6484                                                  | 1564                         | 3645                       | 439                       | 836                       |                             |
| BMI (kg/m <sup>2</sup> )                                                     | Mean                                                  | 1.12                         | 1.16                       | 1.08                      | 1.12                      | 0.78                        |
|                                                                              | 95% CI                                                | 1.04 to 1.21                 | 1.10 to 1.21               | 0.93 to 1.24              | 1.00 to 1.23              |                             |
| Weight (kg)                                                                  | Mean                                                  | 3.25                         | 3.32                       | 3.13                      | 3.23                      | 0.84                        |
|                                                                              | 95% CI                                                | 3.01 to 3.50                 | 3.16 to 3.48               | 2.68 to 3.58              | 2.90 to 3.55              |                             |
| <i>Active to inactive (n)</i>                                                | 1059                                                  | 271                          | 567                        | 96                        | 125                       |                             |
| BMI (kg/m <sup>2</sup> )                                                     | Mean                                                  | 1.07                         | 1.19                       | 1.08                      | 1.21                      | 0.78                        |
|                                                                              | 95% CI                                                | 0.86 to 1.28                 | 1.04 to 1.34               | 0.73 to 1.44              | 0.90 to 1.52              |                             |
| Weight (kg)                                                                  | Mean                                                  | 3.03                         | 3.37                       | 3.20                      | 3.47                      | 0.79                        |
|                                                                              | 95% CI                                                | 2.42 to 3.63                 | 2.95 to 3.79               | 2.19 to 4.21              | 2.59 to 4.35              |                             |
| <i>Inactive to active (n)</i>                                                | 1232                                                  | 341                          | 695                        | 69                        | 217                       |                             |
| BMI (kg/m <sup>2</sup> )                                                     | Mean                                                  | 1.14                         | 1.15                       | 1.10                      | 0.87                      | 0.28                        |
|                                                                              | 95% CI                                                | 0.93 to 1.34                 | 1.00 to 1.30               | 0.65 to 1.54              | 0.62 to 1.12              |                             |
| Weight (kg)                                                                  | Mean                                                  | 3.20                         | 3.28                       | 3.26                      | 2.49                      | 0.30                        |
|                                                                              | 95% CI                                                | 2.63 to 3.78                 | 2.85 to 3.72               | 2.00 to 4.52              | 1.79 to 3.20              |                             |

Data are adjusted for sex, birth year, smoking, education and BMI or weight at Tromsø 3, and shown as adjusted mean and 95% CI. CI=confidence interval, BMI=body mass index, P<sub>equality</sub>=main differences between groups.

**Supplementary Table 9.** BMI and weight change by occupational physical activity change for the Tromsø 1-3 sample in total and in strata of birth year, smoking, education and leisure time physical activity change.

|                             |                                                                           |                              |                            |                           |                           |                             |
|-----------------------------|---------------------------------------------------------------------------|------------------------------|----------------------------|---------------------------|---------------------------|-----------------------------|
| <b>Tromsø 1-3 (1974-87)</b> | <b>Change occupational physical activity Tromsø 1-2 (1974 to 1979-80)</b> |                              |                            |                           |                           | <b>P<sub>equality</sub></b> |
|                             | <b>Total</b>                                                              | <b>Persistently inactive</b> | <b>Persistently Active</b> | <b>Active to inactive</b> | <b>Inactive to active</b> |                             |
|                             | <b>Outcome change Tromsø 2-3 (1979-80 to 1986-87)</b>                     |                              |                            |                           |                           |                             |
| <i>Total (n)</i>            | 3570                                                                      | 1033                         | 1805                       | 366                       | 366                       |                             |
| BMI (kg/m <sup>2</sup> )    | Mean                                                                      | 0.48                         | 0.48                       | 0.49                      | 0.57                      | 0.68                        |
|                             | 95% CI                                                                    | 0.39 to 0.57                 | 0.41 to 0.54               | 0.35 to 0.64              | 0.43 to 0.71              |                             |
| Weight (kg)                 | Mean                                                                      | 1.53                         | 1.50                       | 1.53                      | 1.80                      | 0.69                        |
| (n=3571)                    | 95% CI                                                                    | 1.25 to 1.81                 | 1.30 to 1.71               | 1.08 to 1.97              | 1.36 to 2.25              |                             |
|                             |                                                                           | (n=1806)                     |                            |                           |                           |                             |
| <b>Birth year</b>           | <b>Change occupational physical activity Tromsø 1-2 (1974 to 1979-80)</b> |                              |                            |                           |                           | <b>P<sub>equality</sub></b> |
|                             | <b>Total</b>                                                              | <b>Persistently inactive</b> | <b>Persistently Active</b> | <b>Active to inactive</b> | <b>Inactive to active</b> |                             |
|                             | <b>Outcome change Tromsø 2-3 (1979-80 to 1986-87)</b>                     |                              |                            |                           |                           |                             |
| <i>≤1929 (n)</i>            | 565                                                                       | 174                          | 280                        | 60                        | 51                        |                             |
| BMI (kg/m <sup>2</sup> )    | Mean                                                                      | 0.02                         | 0.05                       | 0.11                      | 0.15                      | 0.93                        |
|                             | 95% CI                                                                    | -0.21 to 0.25                | -0.13 to 0.22              | -0.25 to 0.46             | -0.24 to 0.54             |                             |
| Weight (kg)                 | Mean                                                                      | 0.08                         | 0.13                       | 0.40                      | 0.34                      | 0.95                        |
|                             | 95% CI                                                                    | -0.63 to 0.79                | -0.41 to 0.67              | -0.71 to 1.51             | -0.85 to 1.54             |                             |

|                                                                           |              |                              |                            |                           |                           |                             |
|---------------------------------------------------------------------------|--------------|------------------------------|----------------------------|---------------------------|---------------------------|-----------------------------|
| <i>1930-1939 (n)</i>                                                      | <i>1186</i>  | <i>344</i>                   | <i>619</i>                 | <i>116</i>                | <i>107</i>                |                             |
| BMI (kg/m <sup>2</sup> )                                                  | Mean         | 0.47                         | 0.27                       | 0.46                      | 0.27                      | 0.20                        |
|                                                                           | 95% CI       | 0.31 to 0.63                 | 0.16 to 0.39               | 0.21 to 0.72              | 0.01 to 0.54              |                             |
| Weight (kg)                                                               | Mean         | 1.49                         | 0.87                       | 1.46                      | 0.82                      | 0.18                        |
| (n=1187)                                                                  | 95% CI       | 1.00 to 1.98                 | 0.51 to 1.22               | 0.66 to 2.26              | -0.02 to 1.65             |                             |
|                                                                           |              |                              | (n=620)                    |                           |                           |                             |
| <i>1940-1949 (n)</i>                                                      | <i>1391</i>  | <i>418</i>                   | <i>682</i>                 | <i>140</i>                | <i>151</i>                |                             |
| BMI (kg/m <sup>2</sup> )                                                  | Mean         | 0.53                         | 0.69                       | 0.52                      | 0.86                      | 0.03                        |
|                                                                           | 95% CI       | 0.40 to 0.66                 | 0.59 to 0.80               | 0.30 to 0.73              | 0.65 to 1.07              |                             |
| Weight change (kg)                                                        | Mean         | 1.69                         | 2.19                       | 1.55                      | 2.75                      | 0.02                        |
|                                                                           | 95% CI       | 1.27 to 2.11                 | 1.87 to 2.52               | 0.85 to 2.25              | 2.07 to 3.42              |                             |
| <i>≥1950 (n)</i>                                                          | <i>428</i>   | <i>97</i>                    | <i>224</i>                 | <i>50</i>                 | <i>57</i>                 |                             |
| BMI (kg/m <sup>2</sup> )                                                  | Mean         | 1.03                         | 0.86                       | 1.18                      | 1.02                      | 0.51                        |
|                                                                           | 95% CI       | 0.74 to 1.32                 | 0.67 to 1.05               | 0.79 to 1.58              | 0.66 to 1.38              |                             |
| Weight (kg)                                                               | Mean         | 3.22                         | 2.71                       | 2.71                      | 3.15                      | 0.53                        |
|                                                                           | 95% CI       | 2.31 to 4.14                 | 2.11 to 3.31               | 2.48 to 4.95              | 2.02 to 4.28              |                             |
| <b>Change occupational physical activity Tromsø 1-2 (1974 to 1979-80)</b> |              |                              |                            |                           |                           |                             |
| <b>Smoking</b>                                                            | <b>Total</b> | <b>Persistently inactive</b> | <b>Persistently Active</b> | <b>Active to inactive</b> | <b>Inactive to active</b> | <b>P<sub>equality</sub></b> |
| <b>Outcome change Tromsø 2-3 (1979-80 to 1986-87)</b>                     |              |                              |                            |                           |                           |                             |
| <i>Smoker (n)</i>                                                         | <i>1705</i>  | <i>429</i>                   | <i>930</i>                 | <i>174</i>                | <i>172</i>                |                             |
| BMI (kg/m <sup>2</sup> )                                                  | Mean         | 0.41                         | 0.49                       | 0.52                      | 0.44                      | 0.79                        |
|                                                                           | 95% CI       | 0.27 to 0.56                 | 0.39 to 0.59               | 0.31 to 0.74              | 0.23 to 0.66              |                             |
| Weight (kg)                                                               | Mean         | 1.29                         | 1.54                       | 1.61                      | 1.39                      | 0.80                        |
|                                                                           | 95% CI       | 0.84 to 1.74                 | 1.24 to 1.84               | 0.93 to 2.28              | 0.71 to 2.07              |                             |
| <i>Previous (n)</i>                                                       | <i>503</i>   | <i>141</i>                   | <i>242</i>                 | <i>52</i>                 | <i>68</i>                 |                             |
| BMI (kg/m <sup>2</sup> )                                                  | Mean         | 0.49                         | 0.40                       | 0.18                      | 0.47                      | 0.55                        |
|                                                                           | 95% CI       | 0.25 to 0.72                 | 0.23 to 0.58               | -0.19 to 0.55             | 0.15 to 0.79              |                             |
| Weight (kg)                                                               | Mean         | 1.55                         | 1.26                       | 0.47                      | 1.50                      | 0.46                        |
|                                                                           | 95% CI       | 0.81 to 2.28                 | 0.70 to 1.81               | -0.70 to 1.64             | 0.48 to 2.52              |                             |
| <i>Never smoker (n)</i>                                                   | <i>1362</i>  | <i>463</i>                   | <i>633</i>                 | <i>140</i>                | <i>126</i>                |                             |
| BMI (kg/m <sup>2</sup> )                                                  | Mean         | 0.56                         | 0.48                       | 0.58                      | 0.81                      | 0.08                        |
|                                                                           | 95% CI       | 0.44 to 0.69                 | 0.37 to 0.58               | 0.37 to 0.79              | 0.58 to 1.03              |                             |
| Weight (kg)                                                               | Mean         | 1.80                         | 1.51                       | 1.83                      | 2.54                      | 0.08                        |
| (n=1363)                                                                  | 95% CI       | 1.41 to 2.19                 | 1.18 to 1.84               | 1.15 to 2.50              | 1.83 to 3.25              |                             |
|                                                                           |              |                              | (n=634)                    |                           |                           |                             |
| <b>Change occupational physical activity Tromsø 1-2 (1974 to 1979-80)</b> |              |                              |                            |                           |                           |                             |
| <b>Education</b>                                                          | <b>Total</b> | <b>Persistently inactive</b> | <b>Persistently Active</b> | <b>Active to inactive</b> | <b>Inactive to active</b> | <b>P<sub>equality</sub></b> |
| <b>Outcome change Tromsø 2-3 (1979-80 to 1986-87)</b>                     |              |                              |                            |                           |                           |                             |
| <i>Primary school (n)</i>                                                 | <i>1842</i>  | <i>296</i>                   | <i>1198</i>                | <i>162</i>                | <i>186</i>                |                             |
| BMI (kg/m <sup>2</sup> )                                                  | Mean         | 0.21                         | 0.31                       | 0.40                      | 0.45                      | 0.26                        |
|                                                                           | 95% CI       | 0.05 to 0.37                 | 0.23 to 0.39               | 0.19 to 0.61              | 0.25 to 0.65              |                             |
| Weight (kg)                                                               | Mean         | 0.64                         | 0.97                       | 1.22                      | 1.39                      | 0.26                        |
|                                                                           | 95% CI       | 0.15 to 1.13                 | 0.72 to 1.21               | 0.55 to 1.88              | 0.77 to 2.01              |                             |
| <i>High School (n)</i>                                                    | <i>1002</i>  | <i>332</i>                   | <i>446</i>                 | <i>117</i>                | <i>107</i>                |                             |
| BMI (kg/m <sup>2</sup> )                                                  | Mean         | 0.74                         | 0.58                       | 0.55                      | 0.76                      | 0.28                        |
|                                                                           | 95% CI       | 0.59 to 0.89                 | 0.45 to 0.71               | 0.30 to 0.81              | 0.50 to 1.03              |                             |
| Weight change (kg)                                                        | Mean         | 2.36                         | 1.81                       | 1.72                      | 2.38                      | 0.24                        |
|                                                                           | 95% CI       | 1.88 to 2.84                 | 1.39 to 2.22               | 0.92 to 2.51              | 1.55 to 3.22              |                             |
| <i>University &lt;4 years (n)</i>                                         | <i>423</i>   | <i>210</i>                   | <i>107</i>                 | <i>55</i>                 | <i>51</i>                 |                             |
| BMI (kg/m <sup>2</sup> )                                                  | Mean         | 0.75                         | 0.81                       | 0.55                      | 0.39                      | 0.23                        |
|                                                                           | 95% CI       | 0.56 to 0.93                 | 0.56 to 1.07               | 0.19 to 0.91              | 0.01 to 0.76              |                             |
| Weight (kg)                                                               | Mean         | 2.41                         | 2.60                       | 1.76                      | 1.28                      | 0.25                        |
|                                                                           | 95% CI       | 1.81 to 3.00                 | 1.77 to 3.42               | 0.60 to 2.91              | 0.09 to 2.48              |                             |
| <i>University &gt;4 years (n)</i>                                         | <i>303</i>   | <i>195</i>                   | <i>54</i>                  | <i>32</i>                 | <i>22</i>                 |                             |
| BMI (kg/m <sup>2</sup> )                                                  | Mean         | 0.65                         | 0.79                       | 0.93                      | 1.10                      | 0.33                        |
|                                                                           | 95% CI       | 0.47 to 0.83                 | 0.45 to 1.13               | 0.48 to 1.38              | 0.57 to 1.64              |                             |
| Weight (kg)                                                               | Mean         | 2.08                         | 2.65                       | 2.91                      | 3.54                      | 0.33                        |
| (n=304)                                                                   | 95% CI       | 1.50 to 2.66                 |                            | 1.47 to 4.35              | 1.81 to 5.26              |                             |

1.56 to 3.73  
(n=55)

| Leisure time physical activity change Tromsø 1-2 (1974-80) | Change occupational physical activity Tromsø 1-2 (1974 to 1979-80) |                       |                     |                    |                    | P <sub>equality</sub> |
|------------------------------------------------------------|--------------------------------------------------------------------|-----------------------|---------------------|--------------------|--------------------|-----------------------|
|                                                            | Total                                                              | Persistently inactive | Persistently Active | Active to inactive | Inactive to active |                       |
|                                                            | Outcome change Tromsø 2-3 (1979-80 to 1986-87)                     |                       |                     |                    |                    |                       |
| <i>Persistently inactive (n)</i>                           | 343                                                                | 137                   | 127                 | 38                 | 41                 |                       |
| BMI (kg/m <sup>2</sup> )                                   | Mean                                                               | 0.42                  | 0.36                | 0.32               | 0.60               | 0.83                  |
|                                                            | 95% CI                                                             | 0.16 to 0.68          | 0.10 to 0.63        | -0.14 to 0.78      | 0.12 to 1.07       |                       |
| Weight (kg)                                                | Mean                                                               | 1.33                  | 1.16                | 0.99               | 1.93               | 0.80                  |
|                                                            | 95% CI                                                             | 0.52 to 2.14          | 0.32 to 2.00        | -0.45 to 2.43      | 0.43 to 3.43       |                       |
| <i>Persistently active (n)</i>                             | 2323                                                               | 635                   | 1245                | 218                | 225                |                       |
| BMI (kg/m <sup>2</sup> )                                   | Mean                                                               | 0.49                  | 0.47                | 0.55               | 0.53               | 0.83                  |
|                                                            | 95% CI                                                             | 0.38 to 0.59          | 0.40 to 0.55        | 0.38 to 0.72       | 0.36 to 0.70       |                       |
| Weight (kg)                                                | Mean                                                               | 1.54                  | 1.50                | 1.70               | 1.65               | 0.88                  |
| (n=2324)                                                   | 95% CI                                                             | 1.21 to 1.88          | 1.26 to 1.73        | 1.17 to 2.24       | 1.11 to 2.20       |                       |
|                                                            |                                                                    |                       | (n=1246)            |                    |                    |                       |
| <i>Active to inactive (n)</i>                              | 572                                                                | 163                   | 278                 | 56                 | 75                 |                       |
| BMI (kg/m <sup>2</sup> )                                   | Mean                                                               | 0.43                  | 0.55                | 0.39               | 0.68               | 0.62                  |
|                                                            | 95% CI                                                             | 0.18 to 0.67          | 0.37 to 0.73        | 0.04 to 0.73       | 0.28 to 1.08       |                       |
| Weight (kg)                                                | Mean                                                               | 1.35                  | 1.75                | 1.14               | 2.11               | 0.59                  |
|                                                            | 95% CI                                                             | 0.58 to 2.13          | 1.17 to 2.33        | 0.06 to 2.22       | 0.85 to 3.36       |                       |
| <i>Inactive to active (n)</i>                              | 326                                                                | 97                    | 151                 | 53                 | 25                 |                       |
| BMI (kg/m <sup>2</sup> )                                   | Mean                                                               | 0.63                  | 0.48                | 0.58               | 0.61               | 0.92                  |
|                                                            | 95% CI                                                             | 0.30 to 0.97          | 0.22 to 0.75        | -0.04 to 1.19      | 0.19 to 1.03       |                       |
| Weight (kg)                                                | Mean                                                               | 2.02                  | 1.43                | 2.01               | 1.93               | 0.82                  |
|                                                            | 95% CI                                                             | 0.98 to 3.07          | 0.61 to 2.24        | 0.10 to 3.92       | 0.62 to 3.25       |                       |

Data are adjusted for birth year, smoking, education and BMI or weight at Tromsø 2, and shown as adjusted mean and 95% CI. CI=confidence interval, BMI=body mass index, P<sub>equality</sub>=main differences between groups. Tromsø 1 included only men.
